1 **The plant-specific SCL30a SR protein regulates ABA-dependent**  
2 **seed traits and salt stress tolerance during germination**

3 **Tom Laloum<sup>1∞</sup>, Sofia D. Carvalho<sup>1∞∞a</sup>, Guiomar Martín<sup>1</sup>, Dale N. Richardson<sup>1</sup>, Tiago M.**  
4 **D. Cruz<sup>1</sup>, Raquel F. Carvalho<sup>1</sup>, Kevin L. Stecca<sup>2∞b</sup>, Anthony J. Kinney<sup>2∞c</sup>, Mathias**  
5 **Zeidler<sup>3</sup>, Inês C. R. Barbosa<sup>1∞d</sup>, Paula Duque<sup>1,\*</sup>**

6 <sup>1</sup> Instituto Gulbenkian de Ciência, Rua da Quinta Grande, 6, 2780-156 Oeiras, Portugal

7 <sup>2</sup> Crop Genetics Research and Development, DuPont Experimental Station, Wilmington,  
8 Delaware 19880-0353, USA

9 <sup>3</sup> Institute of Plant Physiology, Justus-Liebig-University Gießen, Senckenbergstraße 3, D-  
10 35390 Gießen, Germany

11 <sup>∞</sup> These authors contributed equally to this work.

12 <sup>∞a</sup> Current address: Colegio de Ciencias Biológicas y Ambientales, Universidad San Francisco  
13 de Quito USFQ, Diego de Robles y Vía Interoceánica, 170901 Quito, Ecuador

14 <sup>∞b</sup> Current address: Fraunhofer USA, 9, Innovation Way, Newark, DE 19711, USA

15 <sup>∞c</sup> Current address: Trait Discovery R&D, Corteva Agriscience, Johnston, IA 50131, USA

16 <sup>∞d</sup> Current address: Department of Plant Molecular Biology, University of Lausanne, 1015  
17 Lausanne, Switzerland

18 \* [duquep@igc.gulbenkian.pt](mailto:duquep@igc.gulbenkian.pt) (PD)

19 **Short title: SCL30a regulates ABA-dependent seed traits and salt stress**  
20 **tolerance**

21 **Abstract**

22 SR (serine/arginine-rich) proteins are conserved RNA-binding proteins best known as key  
23 regulators of splicing, which have also been implicated in other steps of gene expression.  
24 Despite mounting evidence for their role in plant development and stress responses, the  
25 molecular pathways underlying SR protein regulation of these processes remain elusive. Here  
26 we show that the plant-specific *SCL30a* SR protein negatively regulates abscisic acid (ABA)  
27 signaling to control important seed traits and salt stress responses during germination in  
28 Arabidopsis. The *SCL30a* gene is upregulated during seed imbibition and germination, and its  
29 loss of function results in smaller seeds displaying enhanced dormancy and elevated expression  
30 of ABA-responsive genes as well as of genes repressed during the germination process.  
31 Moreover, the knockout mutant is hypersensitive to ABA and high salinity, while transgenic  
32 plants overexpressing *SCL30a* exhibit reduced ABA sensitivity and enhanced tolerance to salt  
33 stress during seed germination. An ABA biosynthesis inhibitor rescues the mutant's enhanced  
34 sensitivity to stress, and epistatic analyses confirm that this hypersensitivity requires a  
35 functional ABA pathway. Finally, seed ABA levels are unchanged by altered *SCL30a*  
36 expression, indicating that the SR protein positively regulates stress tolerance during seed  
37 germination by reducing sensitivity to the phytohormone. Our results reveal a new key player  
38 in ABA-mediated control of early development and stress response, and underscore the role of  
39 plant SR proteins as important regulators of the ABA signaling pathway.

## 40 **Author Summary**

41 Seed germination is a critical step in plant development determining the transition to aerial  
42 growth and exposure to a more challenging environment. As such, seeds have evolved  
43 mechanisms that prevent germination under adverse conditions, thereby increasing the chances  
44 of plant survival. As a general regulator of plant development and a key mediator of stress  
45 responses, the hormone abscisic acid (ABA) promotes a prolonged non-germinating state  
46 called dormancy, influences seed size and represses germination under environmental stress.  
47 Here, we show that an RNA-binding protein, SCL30a, controls seed size, dormancy,  
48 germination and tolerance to high salinity in the model plant *Arabidopsis thaliana*. Loss of  
49 *SCL30a* gene function results in smaller and more dormant seeds with reduced ability to  
50 germinate in a high-salt environment; by contrast, *SCL30a* overexpression produces larger  
51 seeds that germinate faster under salt stress. Using a large-scale gene expression analysis, we  
52 identify the ABA hormonal pathway as a putative target of SCL30a. We then use genetic and  
53 pharmacological tools to unequivocally demonstrate that the uncovered biological functions of  
54 SCL30a are achieved through modulation of the ABA pathway. Our study reveals a novel  
55 regulator of key seed traits and has biotechnological implications for crop improvement under  
56 adverse environments.

## 57 **Introduction**

58 Seed germination begins with rehydration (imbibition) and expansion of the embryo by cell  
59 elongation, which leads to rupture of the weakened seed coat and emergence of the radicle [1].  
60 During water uptake, a prolonged non-germinating state termed seed dormancy must be  
61 relieved before protrusion of the radicle [2]. The completion of seed germination marks a key  
62 developmental milestone in the life cycle of higher plants, being essential for the establishment  
63 of a viable plant. The germination process is highly regulated by both endogenous and  
64 environmental signals that determine the dormancy status of the seed and its aptitude to  
65 germinate [3].

66 The plant hormone abscisic acid (ABA) promotes seed maturation and dormancy while  
67 inhibiting seed germination, thus acting as a key regulator of this critical developmental step  
68 [4,5]. In fact, mutations that affect components of ABA biosynthesis (e.g., *aba2*) or signaling  
69 (e.g., *snrk2.2/3/6*) exhibit reduced seed dormancy and precocious germination [6,7]. ABA has  
70 also more recently been implicated in the control the seed's final size, with ABA production  
71 and signaling modulating the expression of *SHB1*, a main regulator of endosperm  
72 cellularization during seed development [8].

73 Apart from regulating key developmental processes such as seed germination, ABA is a  
74 known major mediator of osmotic stress responses, also in seeds where it acts as an integrator  
75 of different environmental signals to repress germination under unfavorable conditions [5].  
76 While numerous studies have deciphered the genetic components and transcriptional  
77 mechanisms underlying seed germination and osmotic stress responses, the involvement of  
78 posttranscriptional gene regulation, namely of alternative splicing, is beginning to unfold [9–  
79 11].

80 RNA splicing, which excises introns from the precursor mRNA (pre-mRNA) and joins the  
81 flanking exonic sequences to generate mature transcripts, is an essential step in eukaryotic gene

82 expression. This process involves the recognition of intronic sequences called splice sites by  
83 the spliceosome, a large molecular complex consisting of five small nuclear ribonucleoproteins  
84 (snRNPs) and numerous spliceosome-associated proteins that assemble at introns in a precise  
85 order [12,13]. The differential recognition of splice sites results in alternative splicing, which  
86 allows a single gene to express multiple mRNA variants and hence greatly contributes to  
87 transcriptome diversification.

88 SR (serine/arginine-rich) proteins are multi-domain, non-snRNP spliceosomal factors that  
89 regulate pre-mRNA splicing. These RNA-binding proteins use one or two of their N-terminal  
90 RNA recognition motifs (RRMs) to bind to specific cis-acting elements in pre-mRNAs and  
91 enhance or repress splicing [14]. SR proteins recruit core spliceosomal factors to pre-mRNAs  
92 through their C-terminal arginine/serine (RS) domain, which acts a protein-protein interaction  
93 module [15]. The RS domain is also subjected to numerous reversible phosphorylation events  
94 that control SR protein activity and subcellular localization [16,17].

95 Apart from pre-mRNA splicing, non-canonical functions for SR proteins in pre-and post-  
96 splicing activities have been emerging, highlighting their multifaceted roles as important  
97 coordinators of nuclear and cytoplasmic gene expression machineries [18,19]. In one example,  
98 the mammalian SR protein SRSF2 was shown to mediate the activation of the paused Pol II by  
99 releasing the positive transcription elongation factor b (p-TEFb) from inhibitory 7SK  
100 ribonucleoprotein complexes, thus promoting transcriptional elongation [20]. Furthermore,  
101 changes in SRSF2 levels have been shown to affect the accumulation of Pol II at gene loci [21].  
102 More generally, SR proteins influence gene transcription by directly or indirectly interacting  
103 with the C-terminal domain of RNA Pol II during their assembly as RNA processing factors  
104 [18]. Animal SR proteins have also been shown to influence mRNA export, translation and  
105 decay by interacting with major components of the molecular complexes regulating these  
106 processes [19].

107 Functional analyses of individual SR and SR-like proteins in plants have identified specific  
108 roles for these proteins in stress and ABA responses. The Arabidopsis RS40 and RS41 were  
109 found to interact in nuclear speckles with HOS5, a KH-domain RNA-binding protein, and  
110 FRY2/CPL1, a major player in the co-transcriptional processing of nascent transcripts, with  
111 knockout mutants of these two SR proteins displaying hypersensitivity to ABA during seed  
112 germination as well as to the inhibitory effect of salt on root elongation [22]. RSZ22 is a  
113 putative dephosphorylation target of the Clade A protein phosphatase 2C HAI1, a major  
114 component of ABA and osmotic stress signaling in Arabidopsis [23]. The SR-like SR45a was  
115 recently shown to inhibit salt stress tolerance in Arabidopsis by interacting with the RNA cap-  
116 binding protein CBP20 and regulating alternative splicing of transcripts involved in the  
117 response to high salinity [24]. In addition to salt stress responses [25], the other Arabidopsis  
118 SR-like protein, SR45, regulates sugar responses by repressing both ABA signaling and  
119 glucose-induced accumulation of the hormone [26,27], with SR45-bound transcripts being  
120 markedly enriched in ABA signaling functions [28]. In support of a conserved role for these  
121 proteins in splicing regulation, SR45 and SR45a interact with the spliceosomal components  
122 U1-70K and U2AF35b [24,29] involved in the recognition of 5' and 3' splice sites,  
123 respectively.

124 The Arabidopsis genome encodes 18 SR proteins, 10 of which are orthologs of the human  
125 ASF/SF2, 9G8 or SC35, while members of the RS, RS2Z and SCL subfamilies are plant-  
126 specific [30]. SCL30a belongs to the latter subfamily, whose four members are similar to SC35  
127 but display a distinctive short N-terminal charged extension rich in arginines, serines, glycines  
128 and tyrosines [30]. SCL30a interacts with the RS2Z33 SR protein [31] and acts redundantly  
129 with its paralog SCL33 to control alternative splicing of a specific intron in the SCL33 pre-  
130 mRNA [32]. A more recent study described pleiotropic developmental phenotypes for a  
131 quintuple mutant of the four SCL and the SC35 genes, including serrated leaves, late flowering,

132 shorter roots and abnormal silique phyllotaxy, while the corresponding single mutants did not  
133 show obvious phenotypic alterations [33]. Furthermore, all four SCL members (SCL28,  
134 SCL30, SCL30a and SCL33) and SC35 localize in nuclear speckles and interact with major  
135 components of the early spliceosome machinery U170K and U2AF65a [33], corroborating  
136 their function as splicing regulators. Interestingly, these five Arabidopsis SR proteins were also  
137 recently reported to interact with the NRPB4 subunit of RNA Pol II, indicating a potential role  
138 in the regulation of transcription [33].

139 Here, we characterized the plant-specific *SCL30a* gene in Arabidopsis and found that the  
140 encoded protein regulates seed size, dormancy and germination. Loss of *SCL30a* function  
141 affects alternative splicing of a limited number of genes, but upregulates expression of many  
142 osmotic stress and ABA-responsive genes. In agreement with this, the *scl30a-1* loss-of-  
143 function mutant displays strong hypersensitivity to ABA and salt stress during seed  
144 germination. Conversely, overexpression of *SCL30a* reduces ABA sensitivity and confers seed  
145 tolerance to salt stress during germination. Epistatic and pharmacological analyses demonstrate  
146 that SCL30a's function in seeds and salt stress tolerance depends on ABA synthesis and  
147 signaling, demonstrating a key role for this RNA-binding protein in ABA-mediated responses.

## 148 **Results**

### 149 ***SCL30a* expression is markedly induced during seed germination**

150 To initiate the characterization of the Arabidopsis *SCL30a* gene and investigate its expression  
151 pattern, we generated transgenic plants expressing the  $\beta$ -glucuronidase (*GUS*) reporter gene  
152 under the control of the *SCL30a* endogenous promoter. The *SCL30a* promoter was active  
153 throughout plant development (Fig 1A). We observed GUS staining in vascular tissues and  
154 actively dividing cells, such as in the shoot meristem and young leaves (Fig 1A (a)), the primary  
155 root tip (Fig 1A (b)) and lateral root primordia (Fig 1A (c)). At the reproductive phase, *SCL30a*

156 appeared to be particularly expressed in the pistil tip, the vasculature tissue of sepals, the  
157 stamen filaments and pollen grains (Fig 1A (d)) of developing flowers. In embryonic tissues,  
158 the *SCL30a* promoter was active from the early — globular and heart (Fig 1A (e-g)) — to the  
159 late — torpedo and mature embryo (Figure 1A (h-j)) — stages of embryo development. Finally,  
160 in imbibed mature seeds, GUS staining was detected in the whole embryo (Fig 1A (k)) as well  
161 as strongly in the seed coat (Fig 1A (l)), but is mainly expressed at the radicle tip during  
162 germination (Fig 1A (m)).

163 In parallel, we used RT-PCR to study the development- and tissue-specific expression  
164 pattern of *SCL30a*. Consistent with the established *promoter:GUS* expression profile, *SCL30a*  
165 was expressed both in young seedlings and at later developmental stages, with its mRNA being  
166 detected in different aerial tissues, such as leaves, stem, flowers and siliques, but also in roots  
167 (Fig 1B). In embryonic tissues, although *SCL30a* transcripts were undetectable in dry seeds,  
168 gene expression was clearly observed at 3 days of seed imbibition at 4 °C and increased sharply  
169 during the first hours of germination upon transfer to 22 °C and light (Fig 1B).

170 Both animal and plant pre-mRNAs encoding splicing components appear to be particularly  
171 prone to alternative splicing themselves. This has been shown to lead to a dramatic increase of  
172 the transcriptome complexity of the Arabidopsis SR protein family [34,35], prompting us to  
173 examine the splicing pattern of the *SCL30a* gene. Although only one transcript has been  
174 annotated ([www.arabidopsis.org](http://www.arabidopsis.org)), cloning and sequencing of the PCR products amplified from  
175 the *SCL30a* cDNA identified three alternative mRNAs (S1 Fig), consistent with the  
176 information available in PASTDB (<http://pastdb.crg.eu>), a recently developed transcriptome-  
177 wide resource of alternative splicing profiles in Arabidopsis [36]. The shortest and by far most  
178 expressed *SCL30a.1* transcript (Fig 1B and S1B Fig) is predicted to encode the full-length  
179 protein, while the other two splice variants encode putative severely truncated proteins (S1A  
180 Fig).



181 Thus, the Arabidopsis *SCL30a* gene, which produces at least three alternative transcripts,  
182 displays ubiquitous expression in vegetative tissues and is induced during seed germination.

183 **Loss of *SCL30a* function reduces seed size, enhances seed dormancy and delays**  
184 **germination**

185 To investigate the biological roles of *SCL30a*, we isolated a homozygous T-DNA mutant line,  
186 SALK\_041849, carrying the insertion in the gene's third exon (S1A Fig). RT-PCR analysis of  
187 *SCL30a* expression in this *scl30a-1* mutant using primers annealing upstream of the insertion  
188 site revealed transcript levels comparable to the Col-0 wild type, but no expression was  
189 detected when primers flanking or annealing downstream of the T-DNA were used (S1B Fig).  
190 Consistent with the location of the insertion, no splice variants were detected in the mutant,  
191 which only expresses a truncated *SCL30a* transcript lacking the sequence corresponding to the  
192 entire RS domain as well as most of the RRM (S1 Fig). These results indicate that the *scl30a-*  
193 *1* allele is a true loss-of-function mutant.

194 Given that we observed no notable defects in adult plants and the marked induction of the  
195 *SCL30a* gene during seed imbibition and germination (see Fig 1), we focused our phenotypical  
196 analysis of the *scl30a-1* mutant on embryonic tissues. Notably, mature *scl30a-1* seeds  
197 displayed a significant reduction in size, with dry and imbibed mutant seeds being 12 % and  
198 14 % smaller, respectively, than seeds of wild-type plants (Fig 2A). Correlating with their  
199 smaller size, dry mature *scl30a-1* seeds showed reduced weight when compared to the wild  
200 type, but no significant changes in their relative moisture, protein or oil content (S1 Table). A  
201 more detailed compositional analysis revealed only minor changes in the relative levels of a  
202 few unsaturated fatty acids and the trisaccharide raffinose (S1 Table), indicating that loss of  
203 *SCL30a* function does not substantially affect nutrient and water storage in embryonic tissues.  
204 Interestingly, the *scl30a-1* mutant also exhibited enhanced seed dormancy. After 7 days at 22  
205 °C in darkness, the germination rate of freshly-harvested, non-stratified *scl30a-1* seeds was

206 only about one third of that of wild-type seeds (Fig 2B). The germination rate of stratified  
207 *scl30a-1* mutant seeds was slightly lower, exhibiting a significant delay when compared to  
208 wild-type seeds (Fig 2C).

209 The seed phenotypes of the *scl30a-1* mutant prompted us to analyze the expression of the  
210 *ABI3* and *ABI5* genes, two major transcriptional regulators controlling seed development,  
211 dormancy and germination [37,38]. RT-qPCR analyses of germinating seeds showed that the  
212 expression of *ABI5*, and to a lesser extent also *ABI3*, is significantly increased in the *scl30a-1*  
213 mutant (Fig 2D). In agreement, the expression of *Em1*, *Em6*, and *LEA4-5*, three downstream  
214 targets of the *ABI3* and *ABI5* transcription factors [39,40], was also upregulated in *scl30a-1*,  
215 even to a larger extent (Fig 2D).

216 These findings indicate that the SCL30a SR protein plays an *in vivo* role in embryonic  
217 tissues, where it affects seed size, dormancy and germination, and controls the expression of  
218 key genes regulating seed development and germination.

## 219 **The SCL30a protein affects alternative splicing of a small set of genes during seed** 220 **germination**

221 To gain insight into the molecular functions of the SCL30a RNA-binding protein, we next  
222 conducted an RNA-sequencing (RNA-seq) experiment to compare the transcriptomes of wild-  
223 type and mutant germinating seeds. We used the Illumina HiSeq 2500 system to sequence  
224 mRNA libraries prepared from Col-0 and *scl30a-1* seeds 18 h after stratification and obtained  
225 a minimum of 90 million paired-end clean sequence reads per sample. Given the conserved  
226 role of SR proteins in pre-mRNA splicing, we first analyzed the alternative splicing changes  
227 caused by the *scl30a-1* mutation.

228 At the time point sampled, we found only 22 alternative splicing events in 21 genes to be  
229 differentially regulated in *scl30a-1* mutant seeds ( $\Delta\text{PSI} > |15|$ ): seven intron retention (IR),  
230 three exon skipping (ES) and 12 alternative 3' (Alt3) or alternative 5' (Alt5) splice site events

231 (Table 1). Although of low magnitude ( $\Delta\text{PSI} < 25$  in all cases), the RNA-seq alternative  
 232 splicing changes were confirmed in the four events selected for validation by RT-PCR, using  
 233 wild-type and *scl30a-1* RNA samples independent from those analyzed by RNA-seq (S2 Fig).  
 234 Interestingly, all of the seven differentially-regulated IR events showed lower inclusion levels  
 235 in the *scl30a-1* mutant, suggesting that SCL30a negatively regulates splicing of these introns.  
 236 On the other hand, for the three differential ES events identified, the exons were more included  
 237 in the wild type, pointing to a role of SCL30a in promoting splice site recognition. Thus, IR and  
 238 ES results point to a contradictory role of this protein in splicing regulation; however, the  
 239 number of alternative splicing events retrieved is too low to draw conclusions on the  
 240 mechanistic function of SCL30a.

241 **Table 1. Genes displaying alternative splicing changes in germinating *scl30a-1* mutant**  
 242 **seeds.**

243 Means of percent spliced-in index (PSI) in Col-0 wild-type (WT) and *scl30a-1* mutant  
 244 germinating seeds ( $n = 3$ ) are presented. Genes are ordered by type of alternative splicing (AS)  
 245 event — intron retention, (IR, in red), exon skipping (ES, in orange), alternative 5' splice site  
 246 (Alt5, in blue) and alternative 3' splice site (Alt3, in green) — and decreasing absolute  $\Delta\text{PSI}$   
 247 values.

| Gene ID   | Gene name          | AS event ID        | AS event type | WT PSI | <i>scl30a-1</i> PSI | $\Delta\text{PSI}$ |
|-----------|--------------------|--------------------|---------------|--------|---------------------|--------------------|
| AT3G07420 | <i>SYNC2</i>       | AthINT0106607      | IR            | 54.1   | 35.1                | 19.0               |
| AT2G19910 | <i>RDR3</i>        | AthINT0098183      | IR            | 29.1   | 12.2                | 16.9               |
| AT3G07890 |                    | AthINT0022974      | IR            | 26.0   | 9.2                 | 16.8               |
| AT1G06500 |                    | AthINT0001122      | IR            | 53.1   | 36.6                | 16.5               |
| AT2G46915 |                    | AthINT0021222      | IR            | 39.0   | 22.5                | 16.5               |
| AT5G64980 |                    | AthINT0051338      | IR            | 37.1   | 20.7                | 16.4               |
| AT5G09690 | <i>MGT7/MRS2-7</i> | AthINT0086682      | IR            | 27.8   | 12.2                | 15.6               |
| AT3G63445 |                    | AthEX0008460       | ES            | 97.3   | 72.4                | 24.9               |
| AT1G45248 |                    | AthEX0002068       | ES            | 70.5   | 52.9                | 17.6               |
| AT1G10890 |                    | AthEX0000589       | ES            | 42.4   | 25.4                | 17.0               |
| AT1G15410 |                    | AthALTD0000759-2/2 | Alt5          | 89.0   | 68.6                | 20.3               |

|           |               |                     |      |      |      |       |
|-----------|---------------|---------------------|------|------|------|-------|
| AT1G34340 |               | AthALTD0001643-2/3  | Alt5 | 78.8 | 94.9 | -16.1 |
| AT5G24735 | <i>SORF31</i> | AthALTD0009809-7/10 | Alt5 | 32.8 | 48.8 | -16.0 |
| AT5G24735 | <i>SORF31</i> | AthALTD0009809-6/10 | Alt5 | 63.8 | 48.7 | 15.2  |
| AT3G05510 |               | AthALTA0008736-3/4  | Alt3 | 54.8 | 33.9 | 20.9  |
| AT3G53470 |               | AthALTA0011304-2/2  | Alt3 | 34.5 | 55.1 | -20.5 |
| AT3G22260 |               | AthALTA0010043-2/2  | Alt3 | 36.2 | 54.6 | -18.5 |
| AT2G05210 | <i>POT1A</i>  | AthALTA0038411-3/4  | Alt3 | 24.3 | 42.6 | -18.3 |
| AT1G06590 | <i>APC5</i>   | AthALTA0022122-3/4  | Alt3 | 56.6 | 72.6 | -16.0 |
| AT3G27460 | <i>SGF29A</i> | AthALTA0010423-2/4  | Alt3 | 25.7 | 41.2 | -15.6 |
| AT4G38330 |               | AthALTA0014931-4/4  | Alt3 | 74.7 | 59.2 | 15.5  |
| AT5G47380 |               | AthALTA0018392-3/3  | Alt3 | 42.6 | 27.4 | 15.2  |

---

248 Of the 21 genes differentially spliced in the *scl30a-1* mutant, only three have been characterized  
249 previously: *MRS2-7* encodes a magnesium transporter [41], *POT1a* a DNA-binding protein  
250 required for telomere maintenance [42] known to be regulated by alternative splicing [43], and  
251 *SGF29a* is a transcriptional co-activator implicated in salt stress responses [44]. Based on the  
252 gene annotation at TAIR ([www.arabidopsis.org](http://www.arabidopsis.org)), another four genes appear to be also involved  
253 in transcription or different aspects of RNA metabolism, while seven play putative roles in  
254 many different processes, including lipid or nitrogen metabolism, glycolysis, cell division and  
255 protein deubiquitination. Yet, one third of the genes whose splicing was found to be affected  
256 by the SCL30a SR protein (i.e., seven genes) are of unknown function.

## 257 **The SCL30a protein regulates transcriptional responses related to seed germination and** 258 **ABA**

259 We next analyzed the gene expression changes caused by loss of function of the *SCL30a* gene.  
260 Our RNA-seq analysis revealed 382 genes whose expression was significantly changed by at  
261 least two-fold in the *scl30a-1* mutant. Among these, 315 displayed higher transcript levels than  
262 the wild type, whereas 67 were downregulated in the *scl30a-1* mutant (S2 Table).

263 Given the seed and germination phenotypes of the *scl30a-1* mutant (see Fig 2), we then  
264 asked whether the genes whose expression was affected by the SCL30a protein were  
265 transcriptionally regulated during the seed germination process. To address this question, we

266 quantified the expression levels of the genes up- and downregulated in the *scl30a-1* mutant  
267 using data from an extensive germination time-course RNA-seq experiment performed by  
268 Narsai et al. [9] (Fig 3). Remarkably, we found that genes repressed by SCL30a (i.e.,  
269 upregulated in the mutant) are in general highly expressed in dry seeds and downregulated  
270 throughout the germination process (Fig 3A). Conversely, genes whose expression is activated  
271 by SCL30a (i.e., downregulated in the mutant) show the opposite trend, being lowly expressed  
272 in dry seeds and induced during germination (Fig 3B). This finding coincides with the  
273 expression pattern of *SCL30a* (see Fig 1) as well as with the delay in germination exhibited by  
274 the *scl30a-1* mutant (see Fig 2C) and points to this SR protein as an important positive regulator  
275 of seed germination.

276 Importantly, among the genes upregulated in the *scl30a-1* mutant we found many involved  
277 in embryo development, seed maturation and dormancy. They include seed storage proteins  
278 (e.g., *CRUCIFERIN*) and genes involved in the accumulation and storage of lipdic compounds  
279 in seeds (e.g., oleosins), as well as genes involved in the acquisition of desiccation tolerance,  
280 such as many *LATE EMBRYOGENESIS ABUNDANT (LEA)* genes (S2 Table). In agreement,  
281 Gene Ontology (GO) analysis of the *scl30a-1*-upregulated genes showed clear enrichment for  
282 categories related to these developmental processes, such as GO:0045735: nutrient reservoir  
283 activity, GO:0019915: lipid storage, GO:0009414: response to water deprivation or  
284 GO:0009793: embryo development ending in seed dormancy (Fig 4A and S3 Table).  
285 Moreover, consistent with the key role played by the ABA hormone in the regulation of seed  
286 development, maturation, dormancy and germination, the functional category “GO:0009737:  
287 response to abscisic acid” appeared strongly enriched among the *scl30a-1*-upregulated genes.  
288 Indeed, the expression of genes encoding main regulators and targets of the ABA signaling  
289 pathway — including the ABI5 bZIP transcription factor [45], the seed-specific PP2C AHG1  
290 [46] and the ABA-responsive dehydrin RAB18 [47] — was found to be significantly enhanced

291 in the mutant (Fig 2D and S3 and S4 Tables). On the other hand, many genes found to be  
292 downregulated in the *scl30a-1* mutant were related to microtubule activity and cell wall  
293 remodeling (Fig 4B and S3 Table), two important processes known to be activated during  
294 germination of the seed [1,48].

295 To gain further insight into the extent of SCL30a control of ABA responses during seed  
296 germination, we compared the differentially expressed genes in the *scl30a-1* mutant with a list  
297 of ABA-regulated genes obtained from the reanalysis of a previous microarray experiment  
298 performed in germinating seeds submitted to a transient ABA treatment [49]. Strikingly, 80 %  
299 (252 genes) of the genes upregulated in the *scl30a-1* mutant were also induced by ABA in  
300 wild-type germinating seeds (Fig 4C and S5 Table), while 49 % (33 genes) of the genes  
301 downregulated in the *scl30a-1* mutant were repressed by ABA (Fig 4D and S6 Table). We then  
302 analyzed the expression levels of the ABA-regulated genes defined based on [49] in our RNA-  
303 seq data. Interestingly, the 1446 genes upregulated by ABA were significantly more highly  
304 expressed in *scl30a-1* than in the wild type, while the 1675 ABA-downregulated genes were  
305 downregulated in our mutant (Fig 4C and 4D). Together, these results suggest that an important  
306 component of SCL30a function during seed germination is related to the control of ABA-  
307 mediated transcriptional responses.

### 308 **SCL30a is a positive regulator of ABA signaling and salt stress tolerance during seed** 309 **germination**

310 To further characterize and confirm the functional role of the SCL30a SR protein in seeds, we  
311 generated transgenic Arabidopsis lines expressing the full-length *SCL30a.1* transcript under  
312 the control of the 35S promoter in the wild-type Col-0 background. Three independent lines  
313 noticeably overexpressing the *SCL30a.1* mRNA, *SCL30a-OX1*, *SCL30a-OX2* and *SCL30a-*  
314 *OX3* (Fig 5A and S3A Fig), were selected for phenotypical characterization. We first assessed  
315 the impact of *SCL30a* overexpression on the seed traits found to be affected by the *scl30a-1*

316 mutation (see Fig 2). In contrast to what was observed for the *scl30a-1* mutant, imbibed seeds  
317 from the SCL30a-overexpressing plants were significantly (10%) larger than those from wild-  
318 type plants (Fig 5B and S3B Fig). Furthermore, stratified *SCL30a*-overexpressing seeds  
319 germinated slightly faster under control conditions than wild-type seeds (Fig 5C).

320 The differential expression of ABA-related genes observed in the *scl30a-1* mutant prompted  
321 us to analyze ABA response of the different genotypes during germination. We found that the  
322 *scl30a-1* mutant displays strong hypersensitivity to the hormone (Fig 5D and S3C Fig), with  
323 less than 10% of the mutant seeds germinating under ABA concentrations that allowed 75%  
324 germination of the wild type (Fig 5D). In agreement, seeds from the *SCL30a* overexpression  
325 lines were less sensitive to the hormone during seed germination (Fig 5D and S3C Fig). Given  
326 the established link between ABA and osmotic stress responses [5], we next examined the  
327 effects of loss of function and overexpression of the *SCL30a* gene on seed germination under  
328 salt stress. In line with the effect of exogenously applied ABA, the germination rate of mutant  
329 seeds in the presence of 200 mM of NaCl was markedly reduced when compared to those of  
330 the wild type, while the *SCL30a* overexpression lines were hyposensitive to high salinity,  
331 germinating twice as well as the wild type under these conditions (Fig 5D and S3C Fig).

332 The above findings show that the full-length SCL30a SR protein plays an *in vivo* role in  
333 seed development and germination, clearly substantiating the notion that it positively regulates  
334 seed size and germination. Moreover, the strikingly opposite phenotypes under ABA and salt  
335 stress induced by loss of function and overexpression of SCL30a demonstrate that this  
336 Arabidopsis SR protein is a positive regulator of osmotic stress tolerance during germination  
337 of the seed.

### 338 **SCL30a function in seeds depends on the ABA pathway**

339 To investigate whether the role of SCL30a in salt stress responses is mediated by ABA, we  
340 first performed stress germination assays in the presence of fluridone, an inhibitor of ABA

341 biosynthesis [50–52]. Consistent with the well-known role of ABA as a key mediator of salt  
342 stress responses [5], addition of 1  $\mu$ M fluridone notably relieved the inhibition imposed by  
343 NaCl on the germination of wild-type seeds (Fig 6A). Most importantly, the presence of  
344 fluridone rescued the salt stress hypersensitive phenotype of the *scl30a-1* mutant, which  
345 germinated at rates similar to the wild type in NaCl (Fig 6A). This result indicates that the  
346 mutant's salt stress germination phenotype depends on endogenous ABA production.

347 To conclusively establish the ABA dependence of SCL30a function, we next turned to  
348 epistatic analyses and assessed the genetic interaction between *SCL30a* and *ABA2*, encoding a  
349 cytosolic short-chain dehydrogenase reductase involved in the conversion of xanthoxin to  
350 ABA-aldehyde during ABA biosynthesis [53], or *ABI4*, which encodes an ERF/AP2-type  
351 transcription factor involved in ABA signal transduction [54,55]. To this end, the *scl30a-1*  
352 mutant was independently crossed with the ABA-deficient *aba2-1* [6] and ABA-insensitive  
353 *abi4-101* [56] mutant alleles to generate the corresponding homozygous double mutants. As  
354 seen in the dose-response curves depicted in Fig 6B, seeds from the *scl30a-1aba2-1* and *scl30a-1*  
355 *abi4-101* double mutants behaved as those of the corresponding single ABA mutants when  
356 germinated under high salinity, showing that SCL30a control of this stress response fully relies  
357 on functional *ABA2* and *ABI4* genes.

358 We then assessed the seed size and dormancy of the different genotypes. Both the *aba2-1*  
359 and the *abi4-101* mutations suppressed the reduced size displayed by *scl30a-1* seeds, with the  
360 area of *scl30a-1aba2-1* imbibed seeds being even significantly larger than those of the wild  
361 type, as previously reported for the *aba2-1* mutant [8] (Fig 6C). Regarding seed dormancy, the  
362 double mutants again showed strikingly similar phenotypes to those induced by single  
363 mutations in the *ABA2* and *ABI4* genes that, in agreement with early reports [6,57], conferred  
364 strongly reduced and normal dormancy, respectively (Fig 6D). Therefore, both *ABA2* and *ABI4*



365 are epistatic to the *SCL30a* gene, indicating that the seed/germination roles of the encoded SR  
366 protein are fully dependent on a functional ABA pathway.

367 The above findings raised the question of whether changes in SCL30a levels affect ABA  
368 biosynthesis or sensing/signaling of the stress hormone. To address this issue, we measured the  
369 endogenous ABA content of wild-type, *scl30a-1* mutant and *SCL30a*-overexpressing seeds  
370 germinated in control conditions or under high salinity stress. Table 2 shows that Col-0, *scl30a-*  
371 *1* and *SCL30a-OX* seeds responded to the presence of 200 mM NaCl by increasing their ABA  
372 content by around two-fold, with no significant differences in ABA levels being observed  
373 between the three genotypes either in the absence or presence of salt stress. As expected, the  
374 ABA content of the ABA biosynthesis *aba2-1* mutant, included as a negative control, was  
375 unaltered by high salinity stress (Table 2). These results suggest that SCL30a activity does not  
376 influence endogenous ABA levels in seeds, rather affecting sensing and/or signal transduction  
377 of the hormone during seed germination.

378 **Table 2. Effect of loss of function or overexpression of *SCL30a* on seed ABA levels.**

379 ABA content (means  $\pm$  SE,  $n = 6-8$ ), in ng/g of fresh weight, of Col-0, *scl30a-1*,  
380 *SCL30a-OX2* and *aba2-1* seeds germinated for 2 days in the absence or presence of  
381 200 mM NaCl. Letters indicate significantly different ABA levels between genotypes  
382 among each condition and asterisks significant differences for each genotype between  
383 control and salt stress conditions ( $p < 0.05$ ; Student's *t*-test).

| Genotype          | Control          | NaCl                          | NaCl/Control     |
|-------------------|------------------|-------------------------------|------------------|
| Col-0             | 31.62 $\pm$ 3.07 | 59.06 $\pm$ 8.40              | *1.86 $\pm$ 0.40 |
| <i>scl30a-1</i>   | 36.45 $\pm$ 7.40 | 73.04 $\pm$ 16.60             | *2.00 $\pm$ 0.80 |
| <i>SCL30a-OX2</i> | 36.54 $\pm$ 7.29 | 89.00 $\pm$ 19.91             | *2.44 $\pm$ 0.98 |
| <i>aba2-1</i>     | 27.86 $\pm$ 6.61 | 24.25 $\pm$ 4.11 <sup>a</sup> | 0.87 $\pm$ 0.35  |

## 384 **Discussion**

385 The first indication that the Arabidopsis SCL30a SR protein was involved in regulating seed-  
386 specific traits came from our gene expression studies, showing high *SCL30a* induction in the  
387 embryo and testa of imbibed seeds as well as during the first stages of germination.  
388 Phenotypical characterization of the *scl30a-1* loss-of-function mutant then revealed that this  
389 gene is required to achieve the final size and adequate dormancy levels of mature Arabidopsis  
390 seeds, as well as subsequently during the germination process. Importantly, we also show that  
391 SCL30a negatively regulates the response to salt stress as well as ABA signaling during  
392 germination of the seed. Accordingly, germinating *scl30a-1* mutant seeds display higher  
393 expression of ABA-related genes, and overexpression of *SCL30a* results in a drastic reduction  
394 of seed sensitivity to high salinity, corroborating a role for this protein as a positive regulator  
395 of abiotic stress tolerance during seed germination.

396 Although the *SCL30a* gene displays ubiquitous expression in vegetative tissues, we were  
397 unable to identify any evident phenotype at later developmental stages. This is likely due to  
398 functional redundancy between members of the SCL subfamily at the adult stage. In fact,  
399 previous phenotypic studies of adult Arabidopsis plants from single mutants in individual SCL  
400 genes did not report any visible alterations, with only a quintuple mutant of the four SCL  
401 members and the *SC35* gene (*scl28 scl30 scl30a scl33 sc35*) exhibiting clear defects in leaf  
402 development and flowering [33].

403 Physiological assays using an ABA biosynthesis inhibitor and epistatic analyses with the  
404 ABA-biosynthesis *ABA2* [6] and the ABA-signaling *ABI4* [57] genes demonstrate that SCL30a  
405 regulation of seed traits is fully dependent on an intact ABA pathway. This is consistent with  
406 the global transcriptional changes associated with the loss of *SCL30a* function, showing a clear  
407 enrichment of ABA-related functions among the genes upregulated in the *scl30a-1* mutant.  
408 Moreover, unchanged ABA levels in mutant and overexpressing seeds, together with the

409 enhanced and reduced sensitivity to exogenously applied ABA caused respectively by loss-of-  
410 function and overexpression of *SCL30a*, indicate that the encoded SR protein represses signal  
411 transduction of the phytohormone rather than its biosynthesis.

412 While the central roles of ABA in the induction and maintenance of seed dormancy as well  
413 as in mediating responses to salt stress are well established [5], few studies have addressed the  
414 involvement of this phytohormone in determining seed size. Nonetheless, expression of the  
415 ubiquitin interaction motif-containing DA1 protein, which limits seed size by restricting the  
416 period of cell proliferation in the seed integuments, is induced by ABA and a *dal1* mutant allele  
417 displays altered ABA sensitivity. However, unlike *SCL30a*, DA1 function appears to be  
418 independent of the *ABI4* gene [58]. ABA has also been reported to regulate final seed size via  
419 the control of endosperm cellularization during seed development, as reflected by the larger  
420 seeds of the *aba2* and *abi5* mutants [8]. Given the smaller seeds produced by the *scl30a-1*  
421 mutant and the newly discovered role for *SCL30a* as a major regulator of ABA transcriptional  
422 responses, it appears more likely that this SR protein regulates endosperm development, and  
423 thereby seed size, by controlling the expression of key ABA components such as the *ABI5*  
424 gene, which is upregulated in the *scl30a-1* mutant.

425 Seeds challenged with osmotic stress undergo an arrest in germination that is triggered by a  
426 rise in their ABA content [59,60]. Our results indicate that by decreasing sensitivity to this  
427 phytohormone, the *SCL30a* SR protein enhances salt stress tolerance during seed germination.  
428 The derepression of a subset of ABA-response genes and the germination delay associated with  
429 the loss of *SCL30a* function in the absence of stress suggest that the SR protein is already able  
430 to repress ABA signaling under optimal growth conditions. Therefore, it is possible that the  
431 hypersensitive phenotype of the *scl30a-1* mutant is a consequence of an already active ABA  
432 signaling state, with the stress stimulus inducing an overaccumulation of ABA-responsive  
433 transcripts in the mutant. Alternatively, the stronger phenotype of *scl30a-1* under stress when

434 compared to control conditions could indicate stress regulation of SCL30a activity. The fact  
435 that the *SCL30a* expression and splicing pattern is unaffected by ABA or salt (data not shown  
436 and [34,49]) points to posttranslational regulation of this RNA-binding protein. In support of  
437 this notion, SR proteins are known to undergo extensive phosphorylation at their RS domain  
438 [14], and stress cues affect both the phosphorylation status and activity of Arabidopsis SR and  
439 SR-related proteins [23,61–65]. Notably, SR protein kinase 4 (SRPK4) and stress-responsive  
440 mitogen-activated protein kinases (MAPKs) were found to phosphorylate SCL30, a close  
441 SCL30a paralog [66].

442 Quite surprisingly, our large-scale transcriptome analysis revealed only 22 alternative  
443 splicing events in 21 genes affected in the *sc130a-1* mutant (dPSI > |15|), thus precluding solid  
444 mechanistic insight into the splicing function of this SR protein. Our results contrast with a  
445 main expected role for SCL30a as a splicing regulator and raise the question of whether this  
446 protein is involved in regulating other steps of gene expression. Beyond splicing, animal SR  
447 proteins have been shown to play important roles in coordinating several steps of gene  
448 expression, including transcriptional activation, nonsense-mediated decay, mRNA export and  
449 translation [18,19,67]. In Arabidopsis, SCL proteins can interact with the NRPB4 subunit of  
450 the RNA Polymerase II, pointing to a potential role in the regulation of gene transcription, and  
451 simultaneous disruption of the four SCL subfamily genes and *SC35* causes drastic  
452 transcriptional changes [33]. Therefore, and in alignment with our transcriptomic results, an  
453 important component of SCL30a function during seed germination could lie in the regulation  
454 of gene transcription. Nonetheless, the RNA-seq experiment performed here reflects the  
455 transcriptome of *sc130a-1* germinating seeds at a specific time point (18 hours after  
456 stratification), and the possibility that the observed gene expression changes are a consequence  
457 of an earlier alternative splicing defect cannot be ruled out. Future identification of the direct

458 targets of SCL30a using immunoprecipitation methods should provide insight into the  
459 molecular functions of this protein during seed germination and stress responses.

460 Seed size is a major component of crop yield and salt stress dramatically reduces plant  
461 productivity worldwide. We have disclosed a novel function for an Arabidopsis splicing factor  
462 —SCL30a— in governing seed size and tolerance to salt stress. Our data also suggest a non-  
463 canonical role for the SCL30a protein, where it could regulate gene transcription rather than  
464 alternative splicing during seed germination. Moreover, we provide evidence that SCL30a  
465 modulates seed traits by interacting with the ABA pathway. The larger and salt-tolerant seeds  
466 produced by SCL30a-overexpressing plants underscore the high potential of this protein for  
467 biotechnical applications. Deeper insight into the mode of action of SCL30a may translate into  
468 improved crop performance under adverse environmental conditions.

## 469 **Materials and methods**

### 470 **Plant materials and growth conditions**

471 The *Arabidopsis thaliana* ecotype Colombia (Col-0) was used as the wild type in all  
472 experiments. Seeds were surface-sterilized for 10 minutes in 50 % (v/v) bleach and 0.07%  
473 (v/v) TWEEN<sup>®</sup>20, stratified for 3 days at 4 °C in the dark and plated on MS media [1X  
474 Murashige and Skoog (MS) salts (Duchefa Biochemie), 2.5 mM MES (pH 5.7), 0.5 mM myo-  
475 inositol and 0.8 % (w/v) agar], before transfer to a growth chamber under 16-h photoperiod  
476 (long-day conditions) or continuous light (cool white fluorescent bulbs, 18W840, 4000K at  
477 100  $\mu\text{mol m}^{-2} \text{s}^{-1}$ ) at 22 °C (light period) or 18 °C (dark period) and 60 % relative humidity.  
478 Seed imbibition (Fig 1, 2A, 5B and 6C) was always performed at 4 °C (equivalent to  
479 stratification). After 2-3 weeks, seedlings were transferred to soil in individual pots.

480 PCR-based genotyping of the SALK\_041849 line (obtained from NASC) with primers  
481 specific for *SCL30a* and the left border of the T-DNA (S7 Table) followed by sequencing of

482 the genomic DNA/T-DNA junction confirmed the insertion site and allowed isolation of a  
483 homozygous line, which was backcrossed twice with the wild type. The *scl30a-1* mutant was  
484 independently crossed with the *aba2-1* [6] and the *abi4-101* [57] alleles (obtained from NASC)  
485 and the corresponding double mutants identified via PCR screening (S7 Table) of F2 progeny  
486 following F1 self-fertilization.

#### 487 **Generation of transgenic plants**

488 Plant transformation was achieved by the floral dip method [68] using *Agrobacterium*  
489 *tumefaciens* strain EHA105.

490 For reporter gene experiments, the 2206 bp immediately upstream of the *SCL30a* start codon  
491 were PCR-amplified (S7 Table) from genomic DNA and subcloned into the pGEM vector  
492 (Promega), where the eGFP-GUS segment isolated from the pKGWFS7 vector [69] using the  
493 *SacII/NcoI* restriction sites was fused at the 3' end of the *SCL30a* promoter sequence. The  
494 entire fragment was transferred into pKGWFS7 via the *SpeI/NcoI* restriction sites, replacing  
495 the original CmR-ccdB-eGFP-GUS cassette, and the construct agroinfiltrated into Col-0 plants.

496 To generate the *Pro35S:SCL30a.1* construct, an RT-PCR fragment corresponding to the  
497 *SCL30a.1* transcript (S7 Table) was inserted into the pBA002 backbone using the *AscI/PacI*  
498 restriction sites, and the construct agroinfiltrated in Col-0 plants. Two independent *SCL30a-*  
499 *OX* lines were first isolated and analyzed. After several seed-to-seed cycles, expression of the  
500 transgene in these *SCL30a-OX2* and *SCL30a-OX3* lines was silenced, with consequent loss of  
501 the corresponding phenotypes. A third overexpression line, *SCL30a-OX1*, was then generated  
502 and phenotypically characterized.

#### 503 **Seed measurements and composition**

504 Wild-type (Col-0) and mutant (*sc130a-1*) plants were sown and grown to maturity  
505 simultaneously under identical conditions, and all assays were performed with seeds from  
506 comparable lots.

507 The area of dry and imbibed seeds was measured using the ImageJ software  
508 (<http://rsbweb.nih.gov/ij>). To determine seed weight, six groups of 1000 dry seeds were  
509 weighed using an Acculab ALC-80.4 (Sartorius) analytical balance.

510 For compositional analysis, dry seeds were bulk harvested by genotype and homogenized.  
511 The oil, protein and soluble carbohydrate contents were determined as described previously  
512 [70]. To analyze fatty acids, dry seeds (20 mg) were crushed and sonicated in 2 mL of heptane  
513 for 15 minutes at 60 °C. After centrifuging for 5 minutes at 2,000 g, 200 µL of the heptane  
514 layer were transferred to a small vial with 50 µL of trimethylsulfonium hydroxide (TMSH) in  
515 methanol and an additional 300 µL of heptane. After incubation for 30 minutes at room  
516 temperature, 1 µL of the upper heptane layer was used to analyze the fatty acid methyl esters,  
517 which were separated and quantified using a Hewlett-Packard 6890 gas chromatograph as  
518 described in Cahoon *et al.* (2001). All analyses were performed in duplicate on three  
519 independent seed batches per genotype.

## 520 **Germination and dormancy assays**

521 For germination assays, fully mature siliques from dehydrated plants were collected and stored  
522 in the dark at room temperature for at least one week before phenotypical analysis. After  
523 surface-sterilization and stratification for 3 days at 4 °C in the dark, 70-100 seeds of each  
524 genotype were sown on MS media supplemented or not with the appropriate concentrations of  
525 NaCl, ABA (mixed isomers, A1049; Sigma) or fluridone (45511, Fluka) and then transferred  
526 to long-day conditions, except for the determination of germination rates under control  
527 conditions (Fig 2C and 5C), which was conducted under continuous light to avoid the effect of  
528 long dark periods during a short time course. To assess dormancy, seeds from freshly mature

529 siliques were collected from the tree, immediately surface-sterilized and plated on MS media  
530 before transfer to dark at 22 °C, with control seeds being stratified for 3 days at 4 °C in the dark  
531 before transfer to long-day conditions. Percentages of seed germination, defined as protrusion  
532 of the radicle through the seed coat, were scored over the total number of seeds. The results  
533 presented are representative of at least three independent experiments.

#### 534 **ABA content determination**

535 Mature seeds harvested from Col-0, *scl30a-1*, *SCL30a-OX2* or *aba2-1* dehydrated plants and  
536 stored for 5 months were stratified for 3 days at 4 °C in the dark, sown on MS media with or  
537 without 200 mM NaCl and grown for 2 days under long-day conditions. Seeds were then  
538 collected and endogenous ABA levels quantified using an immunoassay as described in [26].

#### 539 **Expression and alternative splicing analyses of individual genes**

540 Histochemical staining of GUS activity in Pro*SCL30a*:*GUS* transgenic lines was performed as  
541 described by Sundaresan *et al.* [71].

542 For the RT-PCR analysis shown in Fig 1, S1 Fig and S3 Fig, total RNA was extracted from  
543 different plant tissues using TRI Reagent (T924; Sigma-Aldrich) or from dry, imbibed and up  
544 to 5-day germinated seeds using the innuPREP Plant RNA Kit (Analytik Jena). First-strand  
545 cDNA synthesis and PCR amplification were performed as described in [72], using the primers  
546 and number of cycles indicated in Table S7 as well as *ROCI* as a reference gene. Results are  
547 representative of at least three experiments.

548 For the RT-qPCR analyses shown in Fig 2D, seeds were stratified for 3 days at 4 °C, sown  
549 on MS media, transferred to continuous light conditions, and collected after 18 hours (prior to  
550 radicle emergence) to avoid major developmental effects. For the RT-qPCR of Fig 5A,  
551 seedlings were grown for 1 week after stratification. Total RNA was extracted using the  
552 innuPREP Plant RNA Kit (Analytik Jena), digested with the RQ1 DNase (Promega), and first



553 strand cDNA synthesized using 1 µg RNA, Super Script III Reverse Transcriptase (Invitrogen)  
554 and a poly-T primer. qPCR was performed using an ABI QuantStudio sequence detection  
555 system (Applied Biosystems) and Luminaris Color HiGreen qPCR Master Mix (Thermo  
556 Scientific) on 2.5 µL of cDNA (diluted 1:10) per 10-µL reaction volume, containing 300 nM  
557 of each gene-specific primer (S7 Table). Reaction cycles were 95 °C for 2 min (1X), 95° C for  
558 30 s/60 °C for 30 s/72 °C for 30 s (40X), followed by a melting curve step to confirm the  
559 specificity of the amplified products. *UBQ10* and *ROC5* were used as reference genes. Each  
560 experiment was replicated at least three times.

561 For the analyses of alternative splicing shown in S2 Fig, PCR with the NZYTaQ II 2x Green  
562 Master Mix (Nzytech) was performed on cDNA from three biological replicates of germinating  
563 seeds (18 hours after stratification, continuous light) using primers flanking the alternatively  
564 spliced intron (S7 Table) obtained from PASTDB ([pastdb.crg.edu](http://pastdb.crg.edu)). Reaction cycles were 95  
565 °C for 3 min (1X), 95 °C for 30 s/58 °C for 30 s/72 °C for 5 min (35X). The PCR products  
566 then were loaded on a 2% agarose gel and gel bands quantified using the ImageJ software  
567 (<http://rsbweb.nih.gov/ij>). The percent spliced-in (PSI) for each alternative splicing event was  
568 calculated after quantification of the inclusion (I) or splicing (S) for a given event as  $PSI = I /$   
569  $(I + S)$ .

#### 570 **RNA-seq sample preparation and sequencing**

571 Approximately 50 mg of Col-0 wild type and *scl30a-1* mutant seeds (three biological  
572 replicates) were surface-sterilized, stratified at 4 °C for 3 days and sown on MS media for 18  
573 hours under continuous light, before total RNA was extracted using the innuPREP Plant RNA  
574 Kit (Analytik Jena). The RNA-seq libraries generated from Col-0 and *scl30a-1* seeds were  
575 prepared and sequenced at the Center for Genomic Regulation (Barcelona, Spain) using the  
576 HiSeq Sequencing V4 Chemistry kit (Illumina, Inc) and the HiSeq 2500 sequencer (Illumina,  
577 Inc), with a read length of 2 x 125 bp.

578 **RNA-seq quantification of sequence inclusion and identification of differentially-spliced**  
579 **genes**

580 We employed vast-tools v2.5.1 to quantify alternative splicing from RNA-seq for *A. thaliana*  
581 [36,73]. This tool quantifies exon skipping (ES), intron retention (IR), and alternative 3' (Alt3)  
582 and 5' (Alt5) splice sites. For all these types of events, vast-tools estimates the percent of  
583 inclusion of the alternative sequence (PSI) using only exon-exon (or exon-intron for IR)  
584 junction reads and provides information about the read coverage (see  
585 <https://github.com/vastgroup/vast-tools> for details). To identify alternative splicing events  
586 regulated by SCL30a we used vast-tools compare. This function compared PSI values of each  
587 AS event with sufficient read coverage in all wild-type and *scl30a-1* samples being tested (three  
588 biological replicates of each genotype) and selected those with an average  $\Delta\text{PSI} > 15$  and a  
589  $\Delta\text{PSI}$  between the two distributions  $> 5$  (`--min_dPSI 15 --min_range 5`) (see  
590 <https://github.com/vastgroup/vast-tools> and [73] for details). We also used the `--p_IR` filter to  
591 discard introns with a significant read imbalance between the two exon-intron junctions ( $p <$   
592  $0.05$ , binomial test; see [74] for details). Moreover, to ensure that Alt3 and Alt5 are located in  
593 exons with a sufficient inclusion level, we used the option `--min_ALT_use 25`, which implies  
594 that the host exon has a minimum PSI of at least 25 in each analyzed sample.

595 **RNA-seq quantification of gene expression and identification of differentially expressed**  
596 **genes**

597 Quantification of Arabidopsis transcript expression from our RNA-seq experiment and public  
598 sequencing data on seed germination (GSE94459) was performed using vast-tools v2.5.1 [73].  
599 This tool provides cRPKM numbers for each Arabidopsis transcript as the number of mapped  
600 reads per million mapped reads divided by the number of uniquely mappable positions of the  
601 transcript [36]. To identify differentially expressed genes between wild-type and *scl30a-1*  
602 germinating seeds, we used vast-tools compare\_expr using the option `-norm` (see

603 <https://github.com/vastgroup/vast-tools> for details). In brief, a quantile normalization of  
604 cRPKM values with “Normalize Between Arrays” within the “limma” package of R is first  
605 performed. Next, genes that were not expressed at cRPKM > 5 are filtered out and read counts  
606 > 50 across all the replicates of at least one of the genotypes compared. Graphs in Fig 3 and 4  
607 only show expression of genes that passed these cut-offs. Finally, differentially-expressed  
608 genes were defined as those with a fold change of at least 2 between each of the individual  
609 replicates from each genotype.

### 610 **Assessment of overlap between SCL30a- and ABA-regulated genes**

611 ABA-regulated genes were obtained from the reanalysis of GSE62876 [49] using the default  
612 settings of GEO2R (<https://www.ncbi.nlm.nih.gov/geo/info/geo2r.html>). Three comparisons  
613 were conducted: 0 hours of ABA treatment versus 2, 12 or 24 hours. Genes regulated at any of  
614 these timepoints were selected (FC > 2; adjusted p-value < 0.05). Given that ABA-regulated  
615 genes in [49] are defined based on microarray studies, which do not assess expression of all  
616 Arabidopsis genes as RNA-seq experiments do, for the comparison we discarded one SCL30a-  
617 regulated gene not represented in the microarray. We also discarded ABA-regulated genes not  
618 expressed in our RNA-seq samples (see previous section).

### 619 **Gene ontology enrichment analyses**

620 The Gene Ontology (GO) enrichment analysis shown in Fig 4, which identifies significantly  
621 enriched biological processes, molecular functions and cellular components among the genes  
622 up- and downregulated in the *scl30-1* mutant, was performed using the functional annotation  
623 classification system DAVID version 6.8 [75]. Only statistically significant GO categories (p  
624 < 0.05) are shown in Table S3.

### 625 **Accession numbers**

626 Raw sequencing data and transcript expression results were submitted to the Sequence Read  
627 Archive (accession number GSE181122).

## 628 **Acknowledgments**

629 We thank V. Nunes (IGC Plant Facility) for technical assistance and excellent plant care. This  
630 work was funded by Fundação para a Ciência e a Tecnologia (FCT) through Grants  
631 PTDC/AGR-PRO/119058/2010 and BIA-FBT/31018/2017, as well as PhD Fellowship  
632 SFRH/BD/28519/2006 awarded to S.D.C. Funding from the research unit GREEN-it  
633 “Bioresources for Sustainability” (UIDB/04551/2020) is also acknowledged. T.L was  
634 supported by Marie Skłodowska-Curie Individual Fellowship MSCA-IF-2015 (project  
635 706274), and G.M. was supported by MSCA-IF-2016 (project 750469) and an EMBO Long-  
636 Term Fellowship (ALTF 1576- 2016).

## 637 **References**

- 638 1. Holdsworth MJ, Bentsink L, Soppe WJJ. Molecular networks regulating Arabidopsis seed  
639 maturation, after-ripening, dormancy and germination. *New Phytologist*. 2008;179: 33–  
640 54. doi:10.1111/j.1469-8137.2008.02437.x
- 641 2. Holdsworth MJ, Finch-Savage WE, Grappin P, Job D. Post-genomics dissection of seed  
642 dormancy and germination. *Trends in Plant Science*. 2008;13: 7–13.  
643 doi:10.1016/j.tplants.2007.11.002
- 644 3. Shu K, Liu X, Xie Q, He Z. Two Faces of One Seed: Hormonal Regulation of Dormancy  
645 and Germination. *Molecular Plant*. 2016;9: 34–45. doi:10.1016/j.molp.2015.08.010
- 646 4. Penfield S. Seed dormancy and germination. *Current Biology*. 2017;27: R874–R878.  
647 doi:10.1016/j.cub.2017.05.050

- 648 5. Chen K, Li G-J, Bressan RA, Song C-P, Zhu J-K, Zhao Y. Abscisic acid dynamics,  
649 signaling, and functions in plants. *Journal of Integrative Plant Biology*. 2020;62: 25–54.  
650 doi:10.1111/jipb.12899
- 651 6. Léon-Kloosterziel KM, Gil MA, Ruijs GJ, Jacobsen SE, Olszewski NE, Schwartz SH, et  
652 al. Isolation and characterization of abscisic acid-deficient *Arabidopsis* mutants at two  
653 new loci. *The Plant Journal*. 1996;10: 655–661. doi:10.1046/j.1365-  
654 313X.1996.10040655.x
- 655 7. Nakashima K, Fujita Y, Kanamori N, Katagiri T, Umezawa T, Kidokoro S, et al. Three  
656 *Arabidopsis* SnRK2 Protein Kinases, SRK2D/SnRK2.2, SRK2E/SnRK2.6/OST1 and  
657 SRK2I/SnRK2.3, Involved in ABA Signaling are Essential for the Control of Seed  
658 Development and Dormancy. *Plant and Cell Physiology*. 2009;50: 1345–1363.  
659 doi:10.1093/pcp/pcp083
- 660 8. Cheng ZJ, Zhao XY, Shao XX, Wang F, Zhou C, Liu YG, et al. Abscisic Acid Regulates  
661 Early Seed Development in *Arabidopsis* by ABI5-Mediated Transcription of SHORT  
662 HYPOCOTYL UNDER BLUE1. *The Plant Cell*. 2014;26: 1053–1068.  
663 doi:10.1105/tpc.113.121566
- 664 9. Narsai R, Gouil Q, Secco D, Srivastava A, Karpievitch YV, Liew LC, et al. Extensive  
665 transcriptomic and epigenomic remodelling occurs during *Arabidopsis thaliana*  
666 germination. *Genome Biology*. 2017;18: 172. doi:10.1186/s13059-017-1302-3
- 667 10. Laloum T, Martín G, Duque P. Alternative Splicing Control of Abiotic Stress Responses.  
668 *Trends in Plant Science*. 2018;23: 140–150. doi:10.1016/j.tplants.2017.09.019
- 669 11. Lou L, Ding L, Wang T, Xiang Y. Emerging Roles of RNA-Binding Proteins in Seed  
670 Development and Performance. *International Journal of Molecular Sciences*. 2020;21.  
671 doi:10.3390/ijms21186822

- 672 12. Chen W, Moore MJ. Spliceosomes. *Current Biology*. 2015;25: R181–R183.  
673 doi:10.1016/j.cub.2014.11.059
- 674 13. Meyer K, Koester T, Staiger D. Pre-mRNA Splicing in Plants: In Vivo Functions of  
675 RNA-Binding Proteins Implicated in the Splicing Process. *Biomolecules*. 2015;5: 1717–  
676 1740. doi:10.3390/biom5031717
- 677 14. Morton M, Altamimi N, Butt H, Reddy ASN, Mahfouz M. Serine/Arginine-rich protein  
678 family of splicing regulators: New approaches to study splice isoform functions. *Plant*  
679 *Science*. 2019;283: 127–134. doi:10.1016/j.plantsci.2019.02.017
- 680 15. Shepard PJ, Hertel KJ. The SR protein family. *Genome Biology*. 2009;10: 242.  
681 doi:10.1186/gb-2009-10-10-242
- 682 16. Zhou Z, Fu X-D. Regulation of splicing by SR proteins and SR protein-specific kinases.  
683 *Chromosoma*. 2013;122: 191–207. doi:10.1007/s00412-013-0407-z
- 684 17. Barta A, Kalyna M, Lorković ZJ. Plant SR Proteins and Their Functions. In: Reddy ASN,  
685 Golovkin M, editors. *Nuclear pre-mRNA Processing in Plants*. Berlin, Heidelberg:  
686 Springer Berlin Heidelberg; 2008. pp. 83–102. doi:10.1007/978-3-540-76776-3\_5
- 687 18. Jeong S. SR Proteins: Binders, Regulators, and Connectors of RNA. *Mol Cells*.  
688 2017/01/26 ed. 2017;40: 1–9. doi:10.14348/molcells.2017.2319
- 689 19. Wagner RE, Frye M. Noncanonical functions of the serine-arginine-rich splicing factor  
690 (SR) family of proteins in development and disease. *BioEssays*. 2021;43: 2000242.  
691 doi:10.1002/bies.202000242
- 692 20. Ji X, Zhou Y, Pandit S, Huang J, Li H, Lin CY, et al. SR Proteins Collaborate with 7SK  
693 and Promoter-Associated Nascent RNA to Release Paused Polymerase. *Cell*. 2013;153:  
694 855–868. doi:10.1016/j.cell.2013.04.028

- 695 21. Lin S, Coutinho-Mansfield G, Wang D, Pandit S, Fu X-D. The splicing factor SC35 has  
696 an active role in transcriptional elongation. *Nat Struct Mol Biol.* 2008/07/20 ed. 2008;15:  
697 819–826. doi:10.1038/nsmb.1461
- 698 22. Chen T, Cui P, Chen H, Ali S, Zhang S, Xiong L. A KH-Domain RNA-Binding Protein  
699 Interacts with FIERY2/CTD Phosphatase-Like 1 and Splicing Factors and Is Important  
700 for Pre-mRNA Splicing in Arabidopsis. *PLOS Genetics.* 2013;9: e1003875.  
701 doi:10.1371/journal.pgen.1003875
- 702 23. Chong GL, Foo MH, Lin W-D, Wong MM, Verslues PE. Highly ABA-Induced 1 (HAI1)-  
703 Interacting protein HIN1 and drought acclimation-enhanced splicing efficiency at intron  
704 retention sites. *Proc Natl Acad Sci U S A.* 2019/10/14 ed. 2019;116: 22376–22385.  
705 doi:10.1073/pnas.1906244116
- 706 24. Li Y, Guo Q, Liu P, Huang J, Zhang S, Yang G, et al. Dual roles of the serine/arginine-  
707 rich splicing factor SR45a in promoting and interacting with nuclear cap-binding complex  
708 to modulate the salt-stress response in Arabidopsis. *New Phytologist.* 2021;n/a.  
709 doi:10.1111/nph.17175
- 710 25. Albaqami M, Laluk K, Reddy ASN. The Arabidopsis splicing regulator SR45 confers salt  
711 tolerance in a splice isoform-dependent manner. *Plant Molecular Biology.* 2019;100:  
712 379–390. doi:10.1007/s11103-019-00864-4
- 713 26. Carvalho RF, Carvalho SD, Duque P. The Plant-Specific SR45 Protein Negatively  
714 Regulates Glucose and ABA Signaling during Early Seedling Development in  
715 Arabidopsis. *Plant Physiol.* 2010;154: 772–783. doi:10.1104/pp.110.155523
- 716 27. Carvalho RF, Szakonyi D, Simpson CG, Barbosa ICR, Brown JWS, Baena-González E,  
717 et al. The Arabidopsis SR45 Splicing Factor, a Negative Regulator of Sugar Signaling,  
718 Modulates SNF1-Related Protein Kinase 1 Stability. *Plant Cell.* 2016;28: 1910–1925.  
719 doi:10.1105/tpc.16.00301

- 720 28. Xing D, Wang Y, Hamilton M, Ben-Hur A, Reddy ASN. Transcriptome-Wide  
721 Identification of RNA Targets of Arabidopsis SERINE/ARGININE-RICH45 Uncovers  
722 the Unexpected Roles of This RNA Binding Protein in RNA Processing. *Plant Cell*.  
723 2015;27: 3294. doi:10.1105/tpc.15.00641
- 724 29. Day IS, Golovkin M, Palusa SG, Link A, Ali GS, Thomas J, et al. Interactions of SR45,  
725 an SR-like protein, with spliceosomal proteins and an intronic sequence: insights into  
726 regulated splicing. *The Plant Journal*. 2012;71: 936–947. doi:10.1111/j.1365-  
727 313X.2012.05042.x
- 728 30. Barta A, Kalyna M, Reddy ASN. Implementing a Rational and Consistent Nomenclature  
729 for Serine/Arginine-Rich Protein Splicing Factors (SR Proteins) in Plants. *Plant Cell*.  
730 2010;22: 2926. doi:10.1105/tpc.110.078352
- 731 31. Lopato S, Forstner C, Kalyna M, Hilscher J, Langhammer U, Indrapichate K, et al.  
732 Network of Interactions of a Novel Plant-specific Arg/Ser-rich Protein, atRSZ33, with  
733 atSC35-like Splicing Factors\*. *Journal of Biological Chemistry*. 2002;277: 39989–39998.  
734 doi:10.1074/jbc.M206455200
- 735 32. Thomas J, Palusa SG, Prasad KVSK, Ali GS, Surabhi G-K, Ben-Hur A, et al.  
736 Identification of an intronic splicing regulatory element involved in auto-regulation of  
737 alternative splicing of SCL33 pre-mRNA. *The Plant journal : for cell and molecular*  
738 *biology*. 2012;72: 935—946. doi:10.1111/tpj.12004
- 739 33. Yan Q, Xia X, Sun Z, Fang Y. Depletion of Arabidopsis SC35 and SC35-like  
740 serine/arginine-rich proteins affects the transcription and splicing of a subset of genes.  
741 *PLOS Genetics*. 2017;13: e1006663. doi:10.1371/journal.pgen.1006663
- 742 34. Palusa SG, Ali GS, Reddy ASN. Alternative splicing of pre-mRNAs of Arabidopsis  
743 serine/arginine-rich proteins: regulation by hormones and stresses. *The Plant Journal*.  
744 2007;49: 1091–1107. doi:10.1111/j.1365-313X.2006.03020.x



- 745 35. Palusa SG, Reddy ASN. Extensive coupling of alternative splicing of pre-mRNAs of  
746 serine/arginine (SR) genes with nonsense-mediated decay. *New Phytologist*. 2010;185:  
747 83–89. doi:10.1111/j.1469-8137.2009.03065.x
- 748 36. Martín G, Márquez Y, Mantica F, Duque P, Irimia M. Alternative splicing landscapes in  
749 *Arabidopsis thaliana* across tissues and stress conditions highlight major functional  
750 differences with animals. *Genome Biology*. 2021;22: 35. doi:10.1186/s13059-020-  
751 02258-y
- 752 37. Parcy F, Valon C, Raynal M, Gaubier-Comella P, Delseny M, Giraudat J. Regulation of  
753 gene expression programs during *Arabidopsis* seed development: roles of the ABI3 locus  
754 and of endogenous abscisic acid. *Plant Cell*. 1994;6: 1567–1582.  
755 doi:10.1105/tpc.6.11.1567
- 756 38. Skubacz A, Daszkowska-Golec A, Szarejko I. The Role and Regulation of ABI5 (ABA-  
757 Insensitive 5) in Plant Development, Abiotic Stress Responses and Phytohormone  
758 Crosstalk. *Frontiers in Plant Science*. 2016;7: 1884. doi:10.3389/fpls.2016.01884
- 759 39. Bensmihen S, Rippa S, Lambert G, Jublot D, Pautot V, Granier F, et al. The homologous  
760 ABI5 and EEL transcription factors function antagonistically to fine-tune gene expression  
761 during late embryogenesis. *Plant Cell*. 2002;14: 1391–1403. doi:10.1105/tpc.000869
- 762 40. Tian R, Wang F, Zheng Q, Niza VMAGE, Downie AB, Perry SE. Direct and indirect  
763 targets of the arabidopsis seed transcription factor ABSCISIC ACID INSENSITIVE3.  
764 *The Plant Journal*. 2020;103: 1679–1694. doi:10.1111/tbj.14854
- 765 41. Mao D-D, Tian L-F, Li L-G, Chen J, Deng P-Y, Li D-P, et al. AtMGT7: An *Arabidopsis*  
766 Gene Encoding a Low-Affinity Magnesium Transporter. *Journal of Integrative Plant*  
767 *Biology*. 2008;50: 1530–1538. doi:10.1111/j.1744-7909.2008.00770.x

- 768 42. Surovtseva YV, Shakirov EV, Vespa L, Osbun N, Song X, Shippen DE. Arabidopsis  
769 POT1 associates with the telomerase RNP and is required for telomere maintenance. The  
770 EMBO Journal. 2007;26: 3653–3661. doi:10.1038/sj.emboj.7601792
- 771 43. Tani A, Murata M. Alternative splicing of Pot1 (Protection of telomere)-like genes in  
772 Arabidopsis thaliana. Genes & Genetic Systems. 2005;80: 41–48. doi:10.1266/ggs.80.41
- 773 44. Kaldis A, Tsementzi D, Tanriverdi O, Vlachonasios KE. Arabidopsis thaliana  
774 transcriptional co-activators ADA2b and SGF29a are implicated in salt stress responses.  
775 Planta. 2011;233: 749–762. doi:10.1007/s00425-010-1337-0
- 776 45. Finkelstein RR, Lynch TJ. The Arabidopsis Abscisic Acid Response Gene  
777 *ABI5* Encodes a Basic Leucine Zipper Transcription Factor. Plant Cell.  
778 2000;12: 599. doi:10.1105/tpc.12.4.599
- 779 46. Nishimura N, Yoshida T, Kitahata N, Asami T, Shinozaki K, Hirayama T. ABA-  
780 Hypersensitive Germination1 encodes a protein phosphatase 2C, an essential component  
781 of abscisic acid signaling in Arabidopsis seed. The Plant Journal. 2007;50: 935–949.  
782 doi:10.1111/j.1365-313X.2007.03107.x
- 783 47. Nylander M, Svensson J, Palva ET, Welin BV. Stress-induced accumulation and tissue-  
784 specific localization of dehydrins in Arabidopsis thaliana. Plant Molecular Biology.  
785 2001;45: 263–279. doi:10.1023/A:1006469128280
- 786 48. Yan H, Chaumont N, Gilles JF, Bolte S, Hamant O, Bailly C. Microtubule self-  
787 organisation during seed germination in Arabidopsis. BMC Biol. 2020;18: 44–44.  
788 doi:10.1186/s12915-020-00774-8
- 789 49. Costa MCD, Righetti K, Nijveen H, Yazdanpanah F, Ligterink W, Buitink J, et al. A gene  
790 co-expression network predicts functional genes controlling the re-establishment of  
791 desiccation tolerance in germinated Arabidopsis thaliana seeds. Planta. 2015/03/26 ed.  
792 2015;242: 435–449. doi:10.1007/s00425-015-2283-7

- 793 50. Moore R, Smith JD. Growth, graviresponsiveness and abscisic-acid content of *Zea mays*  
794 seedlings treated with Fluridone. *Planta*. 1984;162: 342–344. doi:10.1007/BF00396746
- 795 51. Ullah H, Chen J-G, Wang S, Jones AM. Role of a Heterotrimeric G Protein in Regulation  
796 of *Arabidopsis* Seed Germination. *Plant Physiology*. 2002;129: 897–907.  
797 doi:10.1104/pp.005017
- 798 52. Lin P-C, Hwang S-G, Endo A, Okamoto M, Koshiba T, Cheng W-H. Ectopic Expression  
799 of ABSCISIC ACID 2/GLUCOSE INSENSITIVE 1 in *Arabidopsis* Promotes Seed  
800 Dormancy and Stress Tolerance. *Plant Physiology*. 2007;143: 745–758.  
801 doi:10.1104/pp.106.084103
- 802 53. Schwartz SH, Leon-Kloosterziel KM, Koornneef M, Zeevaart JAD. Biochemical  
803 Characterization of the *aba2* and *aba3* Mutants in *Arabidopsis thaliana*. *Plant Physiology*.  
804 1997;114: 161–166. doi:10.1104/pp.114.1.161
- 805 54. Finkelstein RR, Li Wang M, Lynch TJ, Rao S, Goodman HM. The *Arabidopsis* Abscisic  
806 Acid Response Locus *ABI4* Encodes an APETALA2 Domain Protein. *Plant*  
807 *Cell*. 1998;10: 1043. doi:10.1105/tpc.10.6.1043
- 808 55. Söderman EM, Brocard IM, Lynch TJ, Finkelstein RR. Regulation and Function of the  
809 *Arabidopsis* ABA-insensitive4 Gene in Seed and Abscisic Acid Response Signaling  
810 Networks1. *Plant Physiology*. 2000;124: 1752–1765. doi:10.1104/pp.124.4.1752
- 811 56. Laby RJ, Kincaid MS, Kim D, Gibson SI. The *Arabidopsis* sugar-insensitive mutants *sis4*  
812 and *sis5* are defective in abscisic acid synthesis and response. *The Plant Journal*. 2000;23:  
813 587–596. doi:10.1046/j.1365-313x.2000.00833.x
- 814 57. Finkelstein RR. Mutations at two new *Arabidopsis* ABA response loci are similar to the  
815 *abi3* mutations. *The Plant Journal*. 1994;5: 765–771. doi:10.1046/j.1365-  
816 313X.1994.5060765.x

- 817 58. Li Y, Zheng L, Corke F, Smith C, Bevan MW. Control of final seed and organ size by the  
818 DA1 gene family in *Arabidopsis thaliana*. *Genes & Development*. 2008;22: 1331–1336.  
819 doi:10.1101/gad.463608
- 820 59. Lopez-Molina L, Mongrand S, McLachlin DT, Chait BT, Chua N-H. ABI5 acts  
821 downstream of ABI3 to execute an ABA-dependent growth arrest during germination.  
822 *The Plant Journal*. 2002;32: 317–328. doi:10.1046/j.1365-313X.2002.01430.x
- 823 60. Lopez-Molina L, Mongrand S, Chua NH. A postgermination developmental arrest  
824 checkpoint is mediated by abscisic acid and requires the ABI5 transcription factor in  
825 *Arabidopsis*. *Proc Natl Acad Sci U S A*. 2001/04/03 ed. 2001;98: 4782–4787.  
826 doi:10.1073/pnas.081594298
- 827 61. Ali GS, Golovkin M, Reddy ASN. Nuclear localization and in vivo dynamics of a plant-  
828 specific serine/arginine-rich protein. *The Plant Journal*. 2003;36: 883–893.  
829 doi:10.1046/j.1365-313X.2003.01932.x
- 830 62. Tillemans V, Leponce I, Rausin G, Dispa L, Motte P. Insights into Nuclear Organization  
831 in Plants as Revealed by the Dynamic Distribution of *Arabidopsis* SR  
832 Splicing Factors. *Plant Cell*. 2006;18: 3218. doi:10.1105/tpc.106.044529
- 833 63. Rausin G, Tillemans V, Stankovic N, Hanikenne M, Motte P. Dynamic  
834 Nucleocytoplasmic Shuttling of an *Arabidopsis* SR Splicing Factor: Role of the RNA-  
835 Binding Domains. *Plant Physiology*. 2010;153: 273–284. doi:10.1104/pp.110.154740
- 836 64. Wang P, Xue L, Batelli G, Lee S, Hou Y-J, Van Oosten MJ, et al. Quantitative  
837 phosphoproteomics identifies SnRK2 protein kinase substrates and reveals the effectors  
838 of abscisic acid action. *Proc Natl Acad Sci USA*. 2013;110: 11205–11210.  
839 doi:10.1073/pnas.1308974110
- 840 65. Umezawa T, Sugiyama N, Takahashi F, Anderson JC, Ishihama Y, Peck SC, et al.  
841 Genetics and Phosphoproteomics Reveal a Protein Phosphorylation Network in the

- 842 Abscisic Acid Signaling Pathway in *Arabidopsis thaliana*. *Sci Signal*. 2013;6: rs8.  
843 doi:10.1126/scisignal.2003509
- 844 66. de la Fuente van Bentem S, Anrather D, Dohnal I, Roitinger E, Csaszar E, Joore J, et al.  
845 Site-Specific Phosphorylation Profiling of *Arabidopsis* Proteins by Mass Spectrometry  
846 and Peptide Chip Analysis. *J Proteome Res*. 2008;7: 2458–2470. doi:10.1021/pr8000173
- 847 67. Howard JM, Sanford JR. The RNAissance family: SR proteins as multifaceted regulators  
848 of gene expression. *Wiley Interdiscip Rev RNA*. 2014/08/22 ed. 2015;6: 93–110.  
849 doi:10.1002/wrna.1260
- 850 68. Clough SJ, Bent AF. Floral dip: a simplified method for *Agrobacterium* -mediated  
851 transformation of *Arabidopsis thaliana*. *The Plant Journal*. 1998;16: 735–743.  
852 doi:10.1046/j.1365-313x.1998.00343.x
- 853 69. Karimi M, Inzé D, Depicker A. GATEWAY™ vectors for *Agrobacterium*-mediated plant  
854 transformation. *Trends in Plant Science*. 2002;7: 193–195. doi:10.1016/S1360-  
855 1385(02)02251-3
- 856 70. Meyer K, Stecca KL, Ewell-Hicks K, Allen SM, Everard JD. Oil and protein  
857 accumulation in developing seeds is influenced by the expression of a cytosolic  
858 pyrophosphatase in *Arabidopsis*. *Plant Physiol*. 2012/05/07 ed. 2012;159: 1221–1234.  
859 doi:10.1104/pp.112.198309
- 860 71. Sundaresan V, Springer P, Volpe T, Haward S, Jones JD, Dean C, et al. Patterns of gene  
861 action in plant development revealed by enhancer trap and gene trap transposable  
862 elements. *Genes & Development*. 1995;9: 1797–1810. doi:10.1101/gad.9.14.1797
- 863 72. Carvalho SD, Saraiva R, Maia TM, Abreu IA, Duque P. XBAT35, a Novel *Arabidopsis*  
864 RING E3 Ligase Exhibiting Dual Targeting of Its Splice Isoforms, Is Involved in  
865 Ethylene-Mediated Regulation of Apical Hook Curvature. *Molecular Plant*. 2012;5:  
866 1295–1309. doi:10.1093/mp/sss048

- 867 73. Tapial J, Ha KCH, Sterne-Weiler T, Gohr A, Braunschweig U, Hermoso-Pulido A, et al.  
868 An atlas of alternative splicing profiles and functional associations reveals new regulatory  
869 programs and genes that simultaneously express multiple major isoforms. *Genome Res.*  
870 2017/08/30 ed. 2017;27: 1759–1768. doi:10.1101/gr.220962.117
- 871 74. Braunschweig U, Barbosa-Morais NL, Pan Q, Nachman EN, Alipanahi B, Gonatopoulos-  
872 Pournatzis T, et al. Widespread intron retention in mammals functionally tunes  
873 transcriptomes. *Genome Res.* 2014/09/25 ed. 2014;24: 1774–1786.  
874 doi:10.1101/gr.177790.114
- 875 75. Huang DW, Sherman BT, Lempicki RA. Systematic and integrative analysis of large gene  
876 lists using DAVID bioinformatics resources. *Nature Protocols.* 2009;4: 44–57.  
877 doi:10.1038/nprot.2008.211

## 878 **Figure Legends**

### 879 **Fig 1. *SCL30a* promoter activity and expression pattern in Arabidopsis.**

880 **(A)** Differential interference contrast microscopy images of GUS-stained transgenic plants  
881 carrying the *promSCL30a:GUS* reporter construct. *SCL30a* promoter activity in 2-week-old  
882 seedlings (a), the primary root tip (b), a lateral root primordium (c), mature and immature  
883 flowers (d), developing embryos (e-j), the embryo (k) and testa (l) from imbibed mature seeds,  
884 and seeds germinated for 1-2 days (m). Scale bars, 100  $\mu$ m. **(B)** RT-PCR analysis of *SCL30a*  
885 transcript levels in vegetative and embryonic tissues of wild-type (Col-0) plants. The location  
886 of the F1 and R1 primers is shown in S1A Fig. Expression of the *cyclophilin (ROCI)* gene was  
887 used as a loading control.

888 **Fig 2. Effect of the *scl30a-1* mutation on seed size, dormancy, germination and seed**  
889 **development gene expression.**

890 **(A)** Representative images of dry and imbibed wild-type (Col-0) and mutant (*scl30a-1*) seeds  
891 (scale bars, 1.5 mm), and quantification of the area of Col-0 (white bars) and *scl30a-1* (black  
892 bars) seeds (means  $\pm$  SE,  $n \geq 60$ ). **(B)** Germination percentages of freshly-harvested Col-0  
893 (white bars) and *scl30a-1* (black bars) seeds scored upon either stratification and 7 days of  
894 incubation in light (control) or no stratification and 7 days of incubation in darkness (means  $\pm$   
895 SE,  $n = 3$ ). **(C)** Germination rates of Col-0 (white circles) and *scl30a-1* (black circles) seeds  
896 scored during the first 3 days after stratification (means  $\pm$  SE,  $n = 3$ ). **(D)** RT-qPCR analysis of  
897 the expression levels of the *ABI3*, *ABI5*, *Em1*, *Em6* and *LEA4-5* genes in Col-0 (white bars)  
898 and *scl30a-1* (black bars) seeds 18 hours after stratification (means  $\pm$  SE,  $n = 4$ ). Expression of  
899 the *cyclophilin (ROC5)* gene was used as a loading control. In **A-D**, asterisks indicate  
900 significant differences from the Col-0 wild type (\*  $p < 0.05$ , \*\*  $p < 0.01$ , \*\*\*  $p < 0.001$ ;  
901 Student's *t*-test).

902 **Fig 3. Genes differentially expressed in the *scl30a-1* mutant and their expression pattern**  
903 **during seed germination.**

904 Box plot representations of the expression levels of the 315 genes upregulated **(A)** or of the 67  
905 genes downregulated **(B)** in the *scl30a-1* mutant (left) and their expression values in samples  
906 collected at different stages of seed germination obtained from [9] (right). See Materials and  
907 methods for details.

908 **Fig 4. Gene ontology analysis of *scl30a-1*-regulated genes and overlap with ABA**  
909 **transcriptional responses.**

910 **(A-B)** The ten most significantly enriched gene ontology categories, including biological  
911 process (purple bars), cellular component (dark-green bars) and molecular function (light-  
912 green bars), for the genes up- **(A)** and down- **(B)** regulated in the *scl30a-1* mutant. **(C-D)**  
913 Overlap between the genes up- **(C)** or down- **(D)** regulated in the *scl30a-1* mutant (green

914 circles) with those up- (C) or down- (D) regulated by ABA in Arabidopsis germinating seeds  
915 from Costa et al. [49] (blue circles), respectively (see Materials and methods for details). The  
916 boxplots on the right represent the distribution of expression of the 1446 ABA-upregulated  
917 genes (C) and 1675 ABA-downregulated genes (D) [49] in wild-type (Col-0) and *scl30a-1*  
918 mutant germinating seeds (see Materials and methods for details), with the asterisks indicating  
919 significant differences from the Col-0 wild type (*Wilcoxon* test, \*\*\*  $p < 0.001$ ).

920 **Fig 5. Seed and germination phenotypes conferred by *SCL30a* overexpression.**

921 (A) RT-qPCR analysis of the expression levels of *SCL30a* in Col-0 (white bar), *scl30a-1* (black  
922 bar) and *SCL30a-OXI* (grey bar) 7-day-old seedlings (means  $\pm$  SE,  $n = 4$ ). Expression of the  
923 *ubiquitin (UBQ10)* gene was used as a loading control. (B) Size (expressed as area) of imbibed  
924 Col-0 (white bar), *scl30a-1* (black bar) and *SCL30a-OXI* (gray bar) seeds (means  $\pm$  SE,  $n \geq$   
925 30). (C) Germination rates of Col-0 (white circles), *scl30a-1* (black circles), and *SCL30a-OXI*  
926 (gray circles) seeds scored during the first 3.5 days after stratification (means  $\pm$  SE,  $n = 3$ ). (D)  
927 Representative images of Col-0, *scl30a-1* and *SCL30a-OXI* seeds germinating in the absence  
928 (control) or presence of 5  $\mu$ M ABA or 200 mM NaCl 7 days after stratification, and germination  
929 percentages of Col-0 (white bars), *scl30a-1* (black bars) and *SCL30a-OXI* (gray bars) seeds in  
930 the absence (control) or presence of 5  $\mu$ M ABA or 200 mM NaCl scored 7 days after  
931 stratification (means  $\pm$  SE;  $n = 3$ ). In A-D, asterisks indicate statistically significant differences  
932 from the Col-0 wild type (\*  $p < 0.05$ , \*\*  $p < 0.01$ , \*\*\*  $p < 0.001$ ; Student's *t*-test).

933 **Fig 6. ABA dependence of the *scl30a-1* mutant phenotypes.**

934 (A) Germination percentages of Col-0 (white bars) and *scl30a-1* (black bars) seeds in the  
935 absence (control) or presence of 200 mM NaCl supplemented or not with 1  $\mu$ M fluridone,  
936 scored 5 days after stratification (means  $\pm$  SE,  $n = 3$ ). Asterisks indicate statistically significant  
937 differences from the Col-0 wild type (\*\*  $p < 0.01$ ; Student's *t*-test). (B) Germination rates of



938 Col-0, *scl30a-1*, *aba2-1*, *abi4-101*, *scl30a-1 aba2-1* and *scl30a-1 abi4-101* seeds under  
939 different NaCl concentrations scored 4 days after stratification (means  $\pm$  SE,  $n = 3$ ). Asterisks  
940 indicate statistically significant differences between the *scl30a-1* mutant and the Col-0 wild  
941 type or the double mutants and the corresponding ABA single mutant (\*  $p < 0.05$ , \*\*  $p < 0.01$ ,  
942 \*\*\*  $p < 0.001$ ; Student's *t*-test). (C) Size (expressed as area) of imbibed Col-0, *scl30a-1*, *aba2-*  
943 *1*, *abi4-101*, *scl30a-1 aba2-1* and *scl30a-1 aba4-101* seeds (means  $\pm$  SE,  $n \geq 60$ ). Asterisks  
944 indicate statistically significant differences from the Col-0 wild type (\*\*\*  $p < 0.001$ ; Student's  
945 *t*-test). (D) Germination percentages of freshly-harvested Col-0, *scl30a-1*, *aba2-1*, *abi4-101*,  
946 *scl30a-1 aba2-1* and *scl30a-1 abi4-101* seeds scored upon either stratification and 7 days of  
947 incubation in light or 7 days of incubation in darkness (means  $\pm$  SE,  $n = 3$ ). Asterisks indicate  
948 statistically significant differences from the Col-0 wild type (\*\*\*  $p < 0.001$ ; Student's *t*-test).

## 949 **Supporting Information Legends**

### 950 **S1 Fig. Structure of the *SCL30a* gene and isolation of the *scl30a-1* loss-of-function mutant.**

951 (A) Schematic representation of the *SCL30a* gene showing the site of insertion and orientation  
952 of the T-DNA in the *scl30a-1* mutant (boxes indicate exons with UTRs in grey, lines between  
953 boxes represent introns, and arrows indicate the location of *SCL30a*- and T-DNA-specific  
954 primers), and structure of the three identified splice variants as well as of the corresponding  
955 predicted protein isoforms (RRM, RNA recognition motif; RS, arginine/serine-rich domain).  
956 The asterisks mark the position of the predicted protein truncation in the *scl30a-1* mutant. (B)  
957 RT-PCR analysis of *SCL30a* transcript levels in wild-type (Col-0) and mutant (*scl30a-1*) 5-day  
958 old seedlings using primers flanking the T-DNA, and up- or downstream of the insertion site.  
959 The location of the F1, F3, R1 and R2 primers is shown in (A). The *UBIQUITIN 10 (UBQ10)*  
960 gene was used as a loading control.

961 **S2 Fig. Validation of selected differential alternative splicing events detected by RNA-**  
962 **seq.**

963 RT-PCR analysis of individual AS events differentially regulated between Col-0 and *scl30a-1*  
964 germinating seeds 18 hours after stratification in **(A)** AT5G64980 (event: AthINT0051338),  
965 **(B)** AT3G07890 (event: AthINT0022974), **(C)** AT2G46915 (event: AthINT0021222) and **(D)**  
966 AT5G09690 (event: AthINT0086682). Graphs represent percent spliced-in (PSI) values  
967 (means  $\pm$  SE  $n = 3-5$ ) after quantification of the corresponding band intensities using the Image  
968 J software. Asterisks indicate statistically significant differences from the Col-0 wild type (\*  $p$   
969  $< 0.05$ ; Student's  $t$ -test).

970 **S3 Fig. Characterization of the *SCL30a-OX2* and *SCL30a-OX3* overexpression lines.**

971 **(A)** RT-PCR analysis of *SCL30a* transcript levels in 7-day-old seedlings of Col-0, *scl30a-1* and  
972 two *SCL30a* overexpression lines (*SCL30a-OX2* and *SCL30a-OX3*). The location of the F2 and  
973 R1 primers is shown in S1A Fig. The *UBIQUITIN 10 (UBQ10)* gene was used as a loading  
974 control. **(B)** Size (expressed as area) of imbibed Col-0 (white bars), *scl30a-1* (black bars) and  
975 *SCL30a-OX2* or *SCL30a-OX3* (gray bars) seeds (means  $\pm$  SE,  $n \geq 60$ ). **(C)** Germination  
976 percentages of Col-0 (white bars), *scl30a-1* (black bars) and *SCL30a-OX2* or *SCL30a-OX3*  
977 (gray bars) in the absence (control) or presence of 3  $\mu$ M ABA or 200 mM NaCl scored 5 days  
978 after stratification. Bars represent means  $\pm$  SE,  $n = 3$ . In **B** and **C**, asterisks indicate significant  
979 differences from the Col-0 wild type (\*  $p < 0.05$ , \*\*  $p < 0.01$ , \*\*\*  $p < 0.001$ ; Student's  $t$ -test).

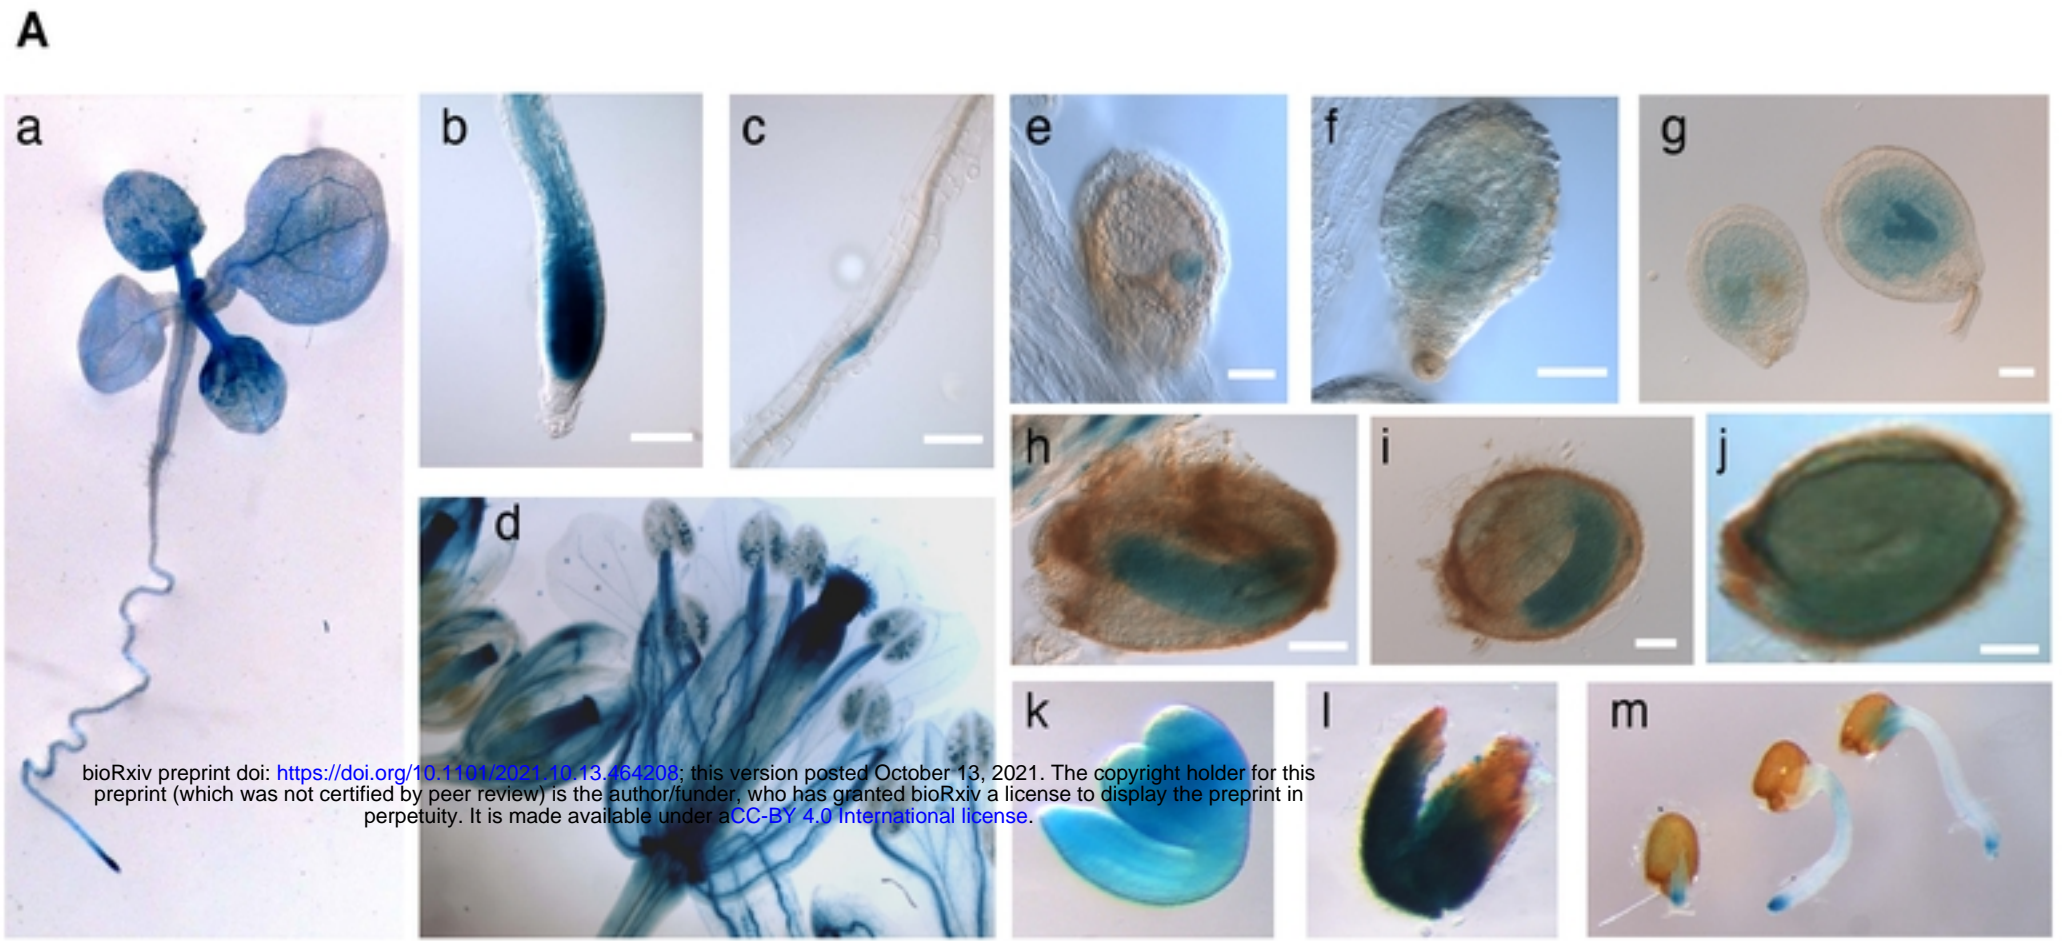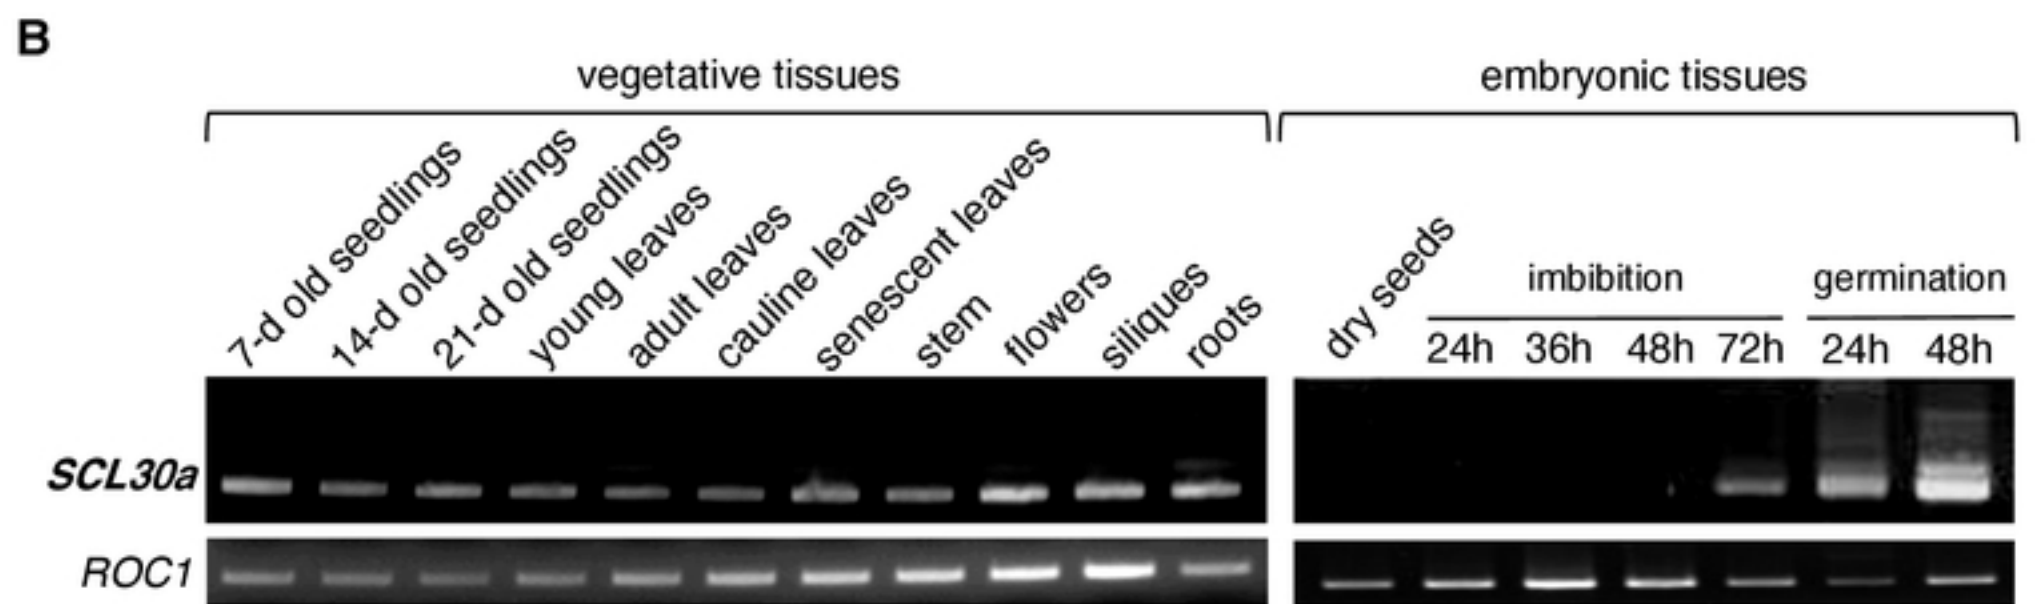

**Fig 1. *SCL30a* promoter activity and expression pattern in Arabidopsis.**

(A) Differential interference contrast microscopy images of GUS-stained transgenic plants carrying the *promSCL30a:GUS* reporter construct. *SCL30a* promoter activity in 2-week-old seedlings (a), the primary root tip (b), a lateral root primordium (c), mature and immature flowers (d), developing embryos (e-j), the embryo (k) and testa (l) from imbibed mature seeds, and seeds germinated for 1-2 days (m). Scale bars, 100  $\mu$ m. (B) RT-PCR analysis of *SCL30a* transcript levels in vegetative and embryonic tissues of wild-type (Col-0) plants. The location of the F1 and R1 primers is shown in S1A Fig. Expression of the *cyclophilin (ROC1)* gene was used as a loading control.

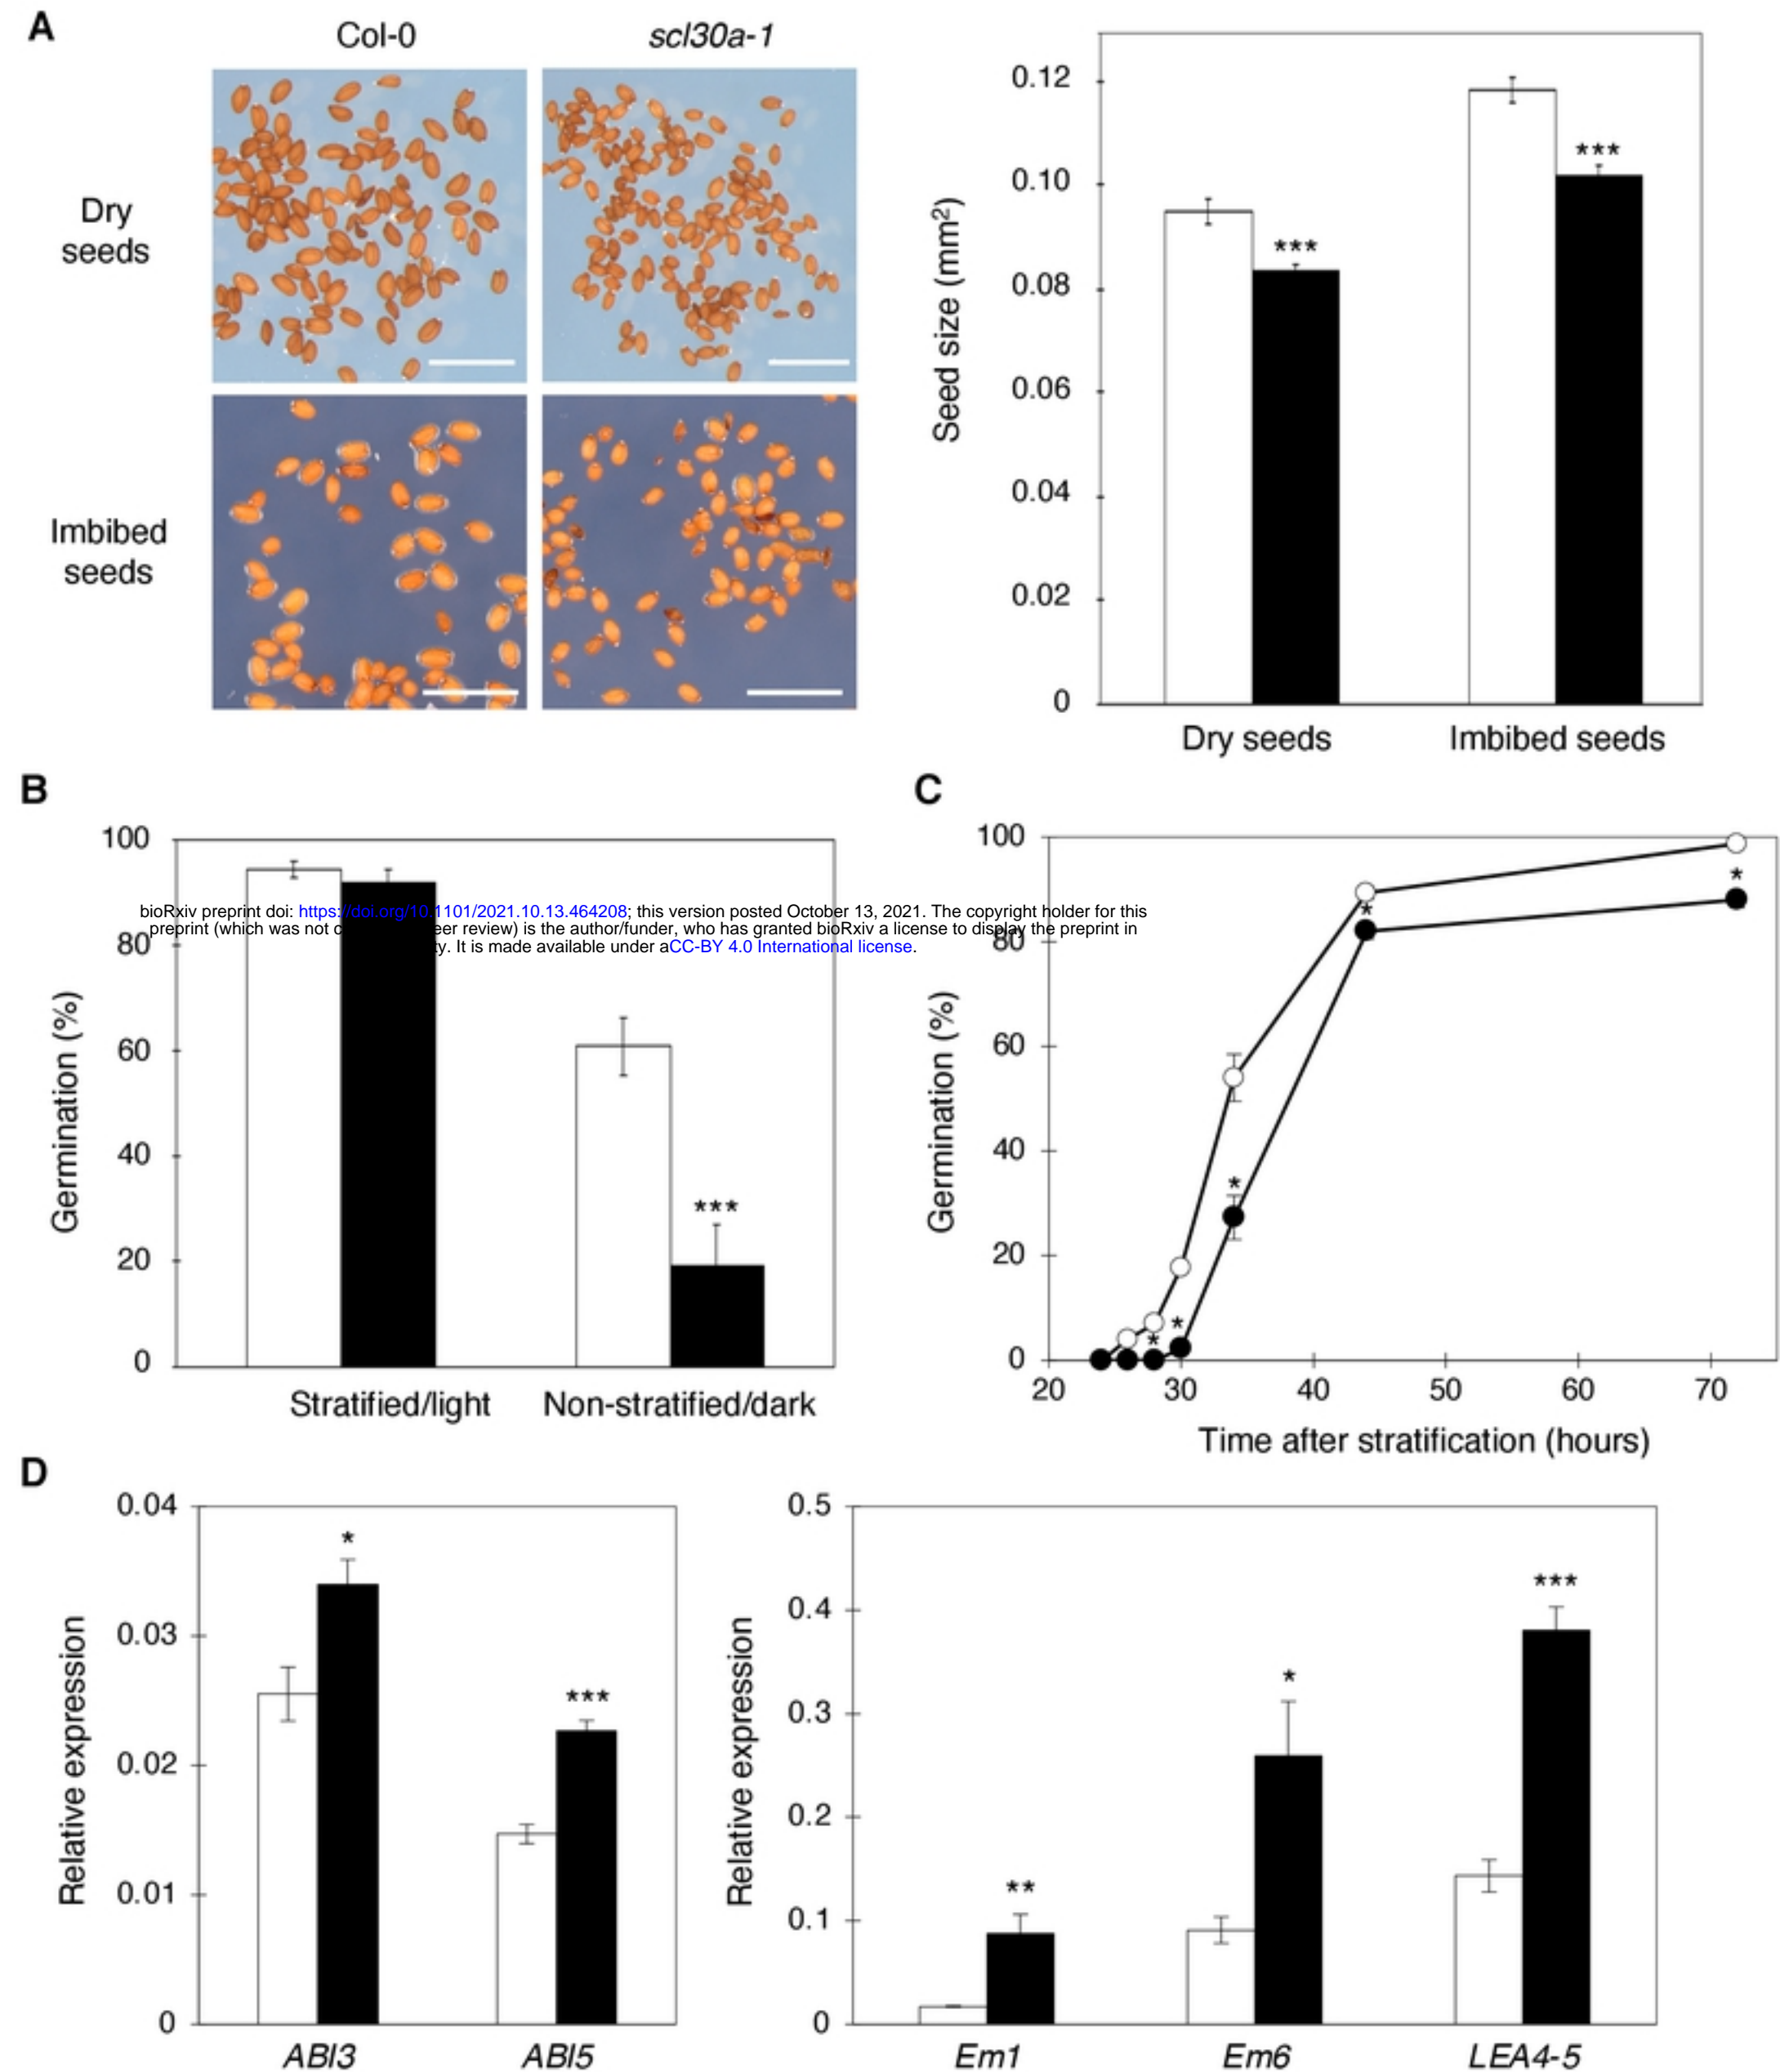

**Fig 2. Effect of the *scl30a-1* mutation on seed size, dormancy, germination and seed development gene expression.**

**(A)** Representative images of dry and imbibed wild-type (Col-0) and mutant (*scl30a-1*) seeds (scale bars, 1.5 mm), and quantification of the area of Col-0 (white bars) and *scl30a-1* (black bars) seeds (means  $\pm$  SE,  $n \geq 60$ ). **(B)** Germination percentages of freshly-harvested Col-0 (white bars) and *scl30a-1* (black bars) seeds scored upon either stratification and 7 days of incubation in light (control) or no stratification and 7 days of incubation in darkness (means  $\pm$  SE,  $n = 3$ ). **(C)** Germination rates of Col-0 (white circles) and *scl30a-1* (black circles) seeds scored during the first 3 days after stratification (means  $\pm$  SE,  $n = 3$ ). **(D)** RT-qPCR analysis of the expression levels of the *ABI3*, *ABI5*, *Em1*, *Em6* and *LEA4-5* genes in Col-0 (white bars) and *scl30a-1* (black bars) seeds 18 hours after stratification (means  $\pm$  SE,  $n = 4$ ). Expression of the *cyclophilin* (*ROC5*) gene was used as a loading control. In **A-D**, asterisks indicate significant differences from the Col-0 wild type (\*  $p < 0.05$ , \*\*  $p < 0.01$ , \*\*\*  $p < 0.001$ ; Student's *t*-test).

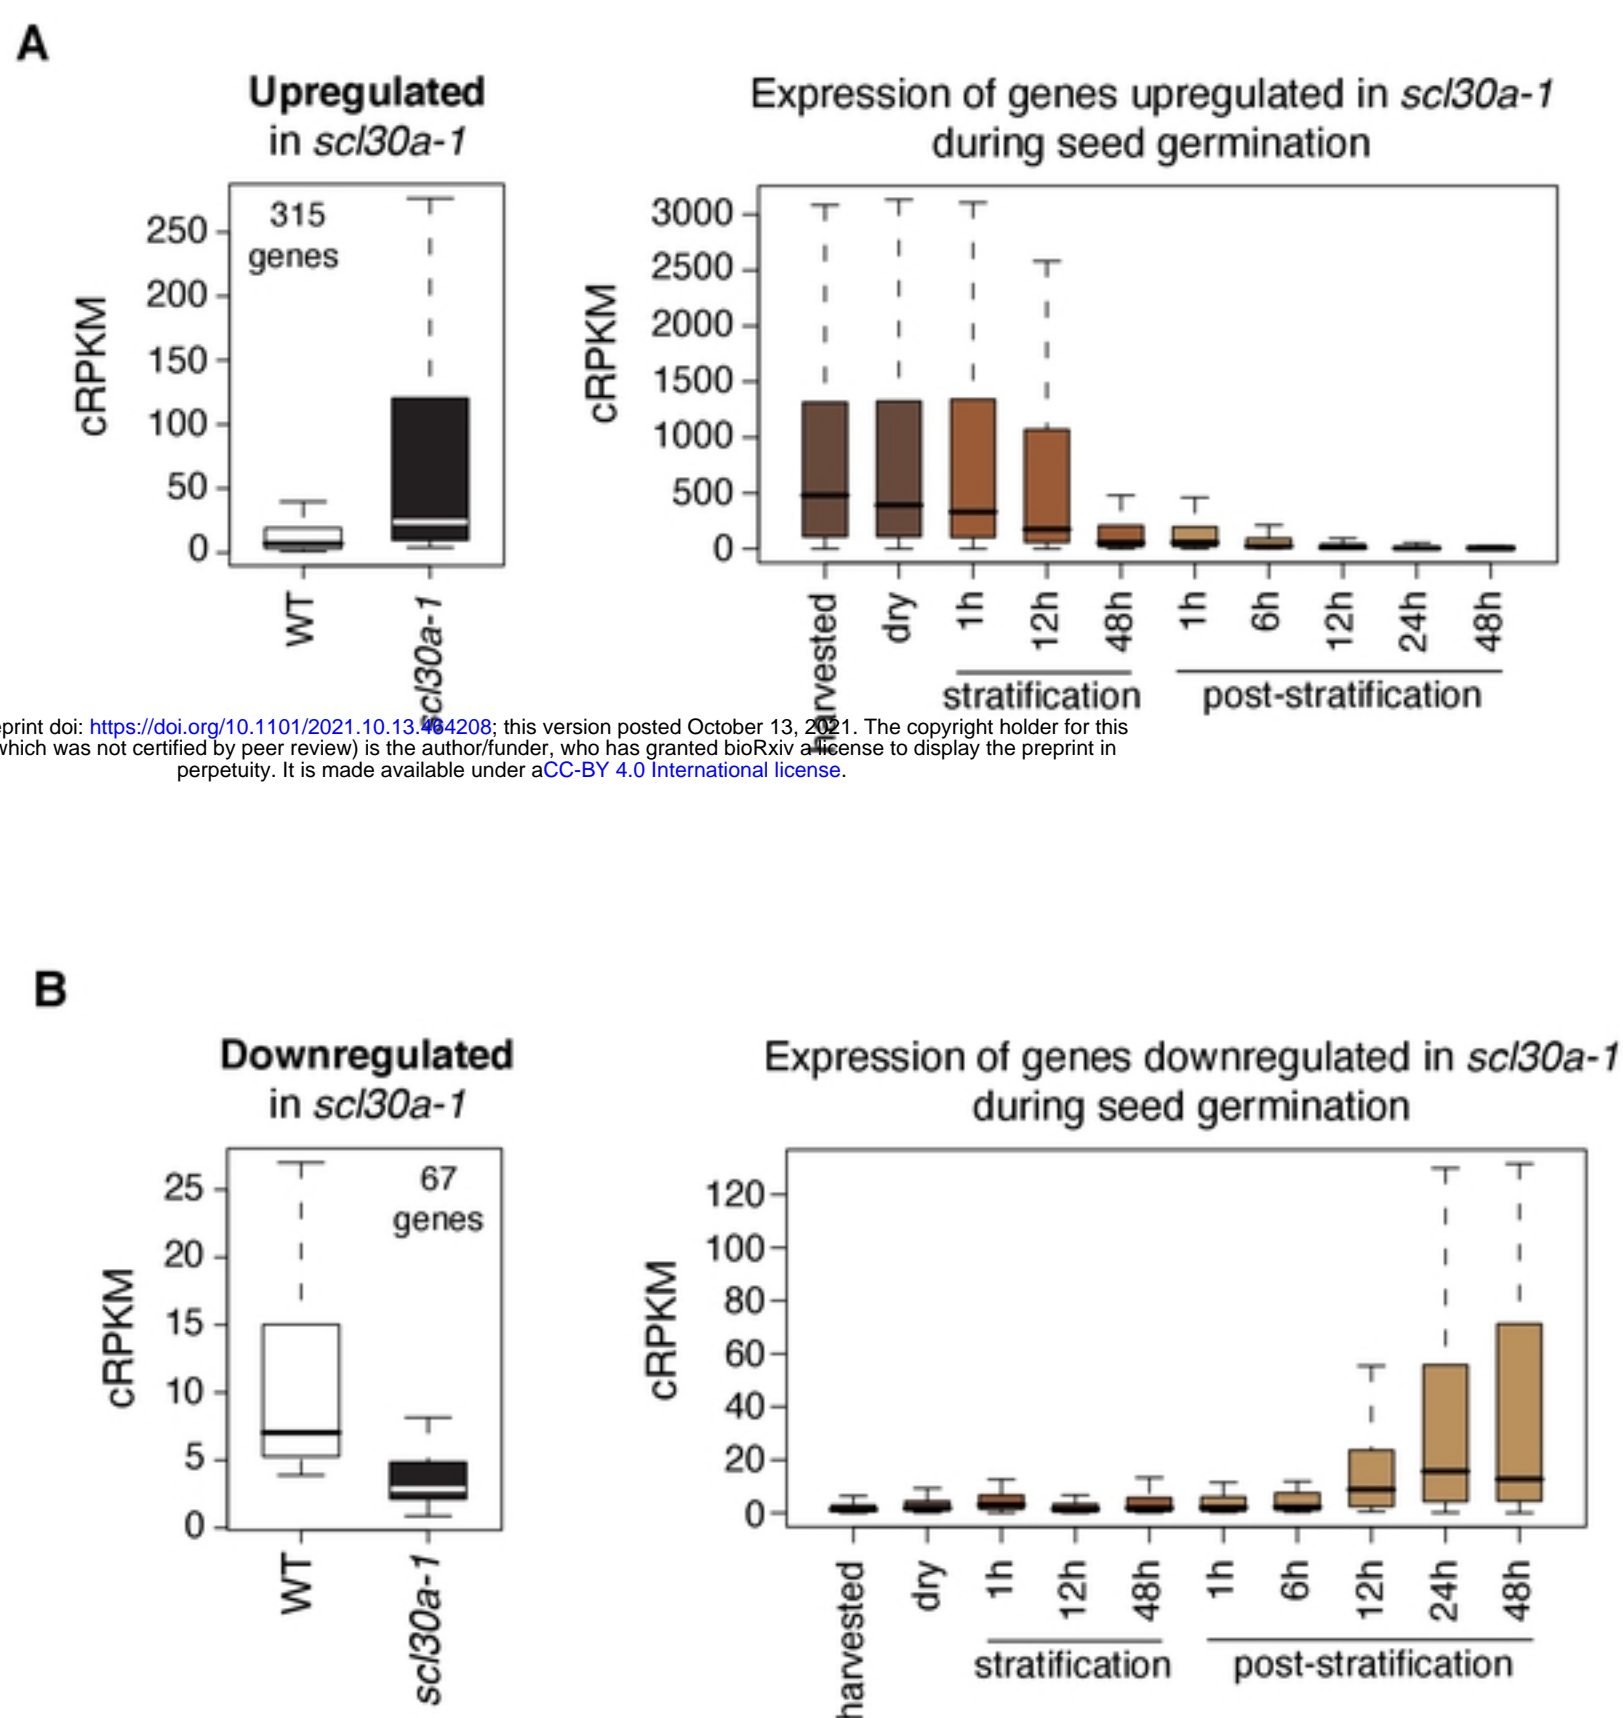

bioRxiv preprint doi: <https://doi.org/10.1101/2021.10.13.464208>; this version posted October 13, 2021. The copyright holder for this preprint (which was not certified by peer review) is the author/funder, who has granted bioRxiv a license to display the preprint in perpetuity. It is made available under aCC-BY 4.0 International license.

**Fig 3. Genes differentially expressed in the *scI30a-1* mutant and their expression pattern during seed germination.**

Box plot representations of the expression levels of the 315 genes upregulated (**A**) or of the 67 genes downregulated (**B**) in the *scI30a-1* mutant (left) and their expression values in samples collected at different stages of seed germination obtained from [9] (right). See Materials and methods for details.

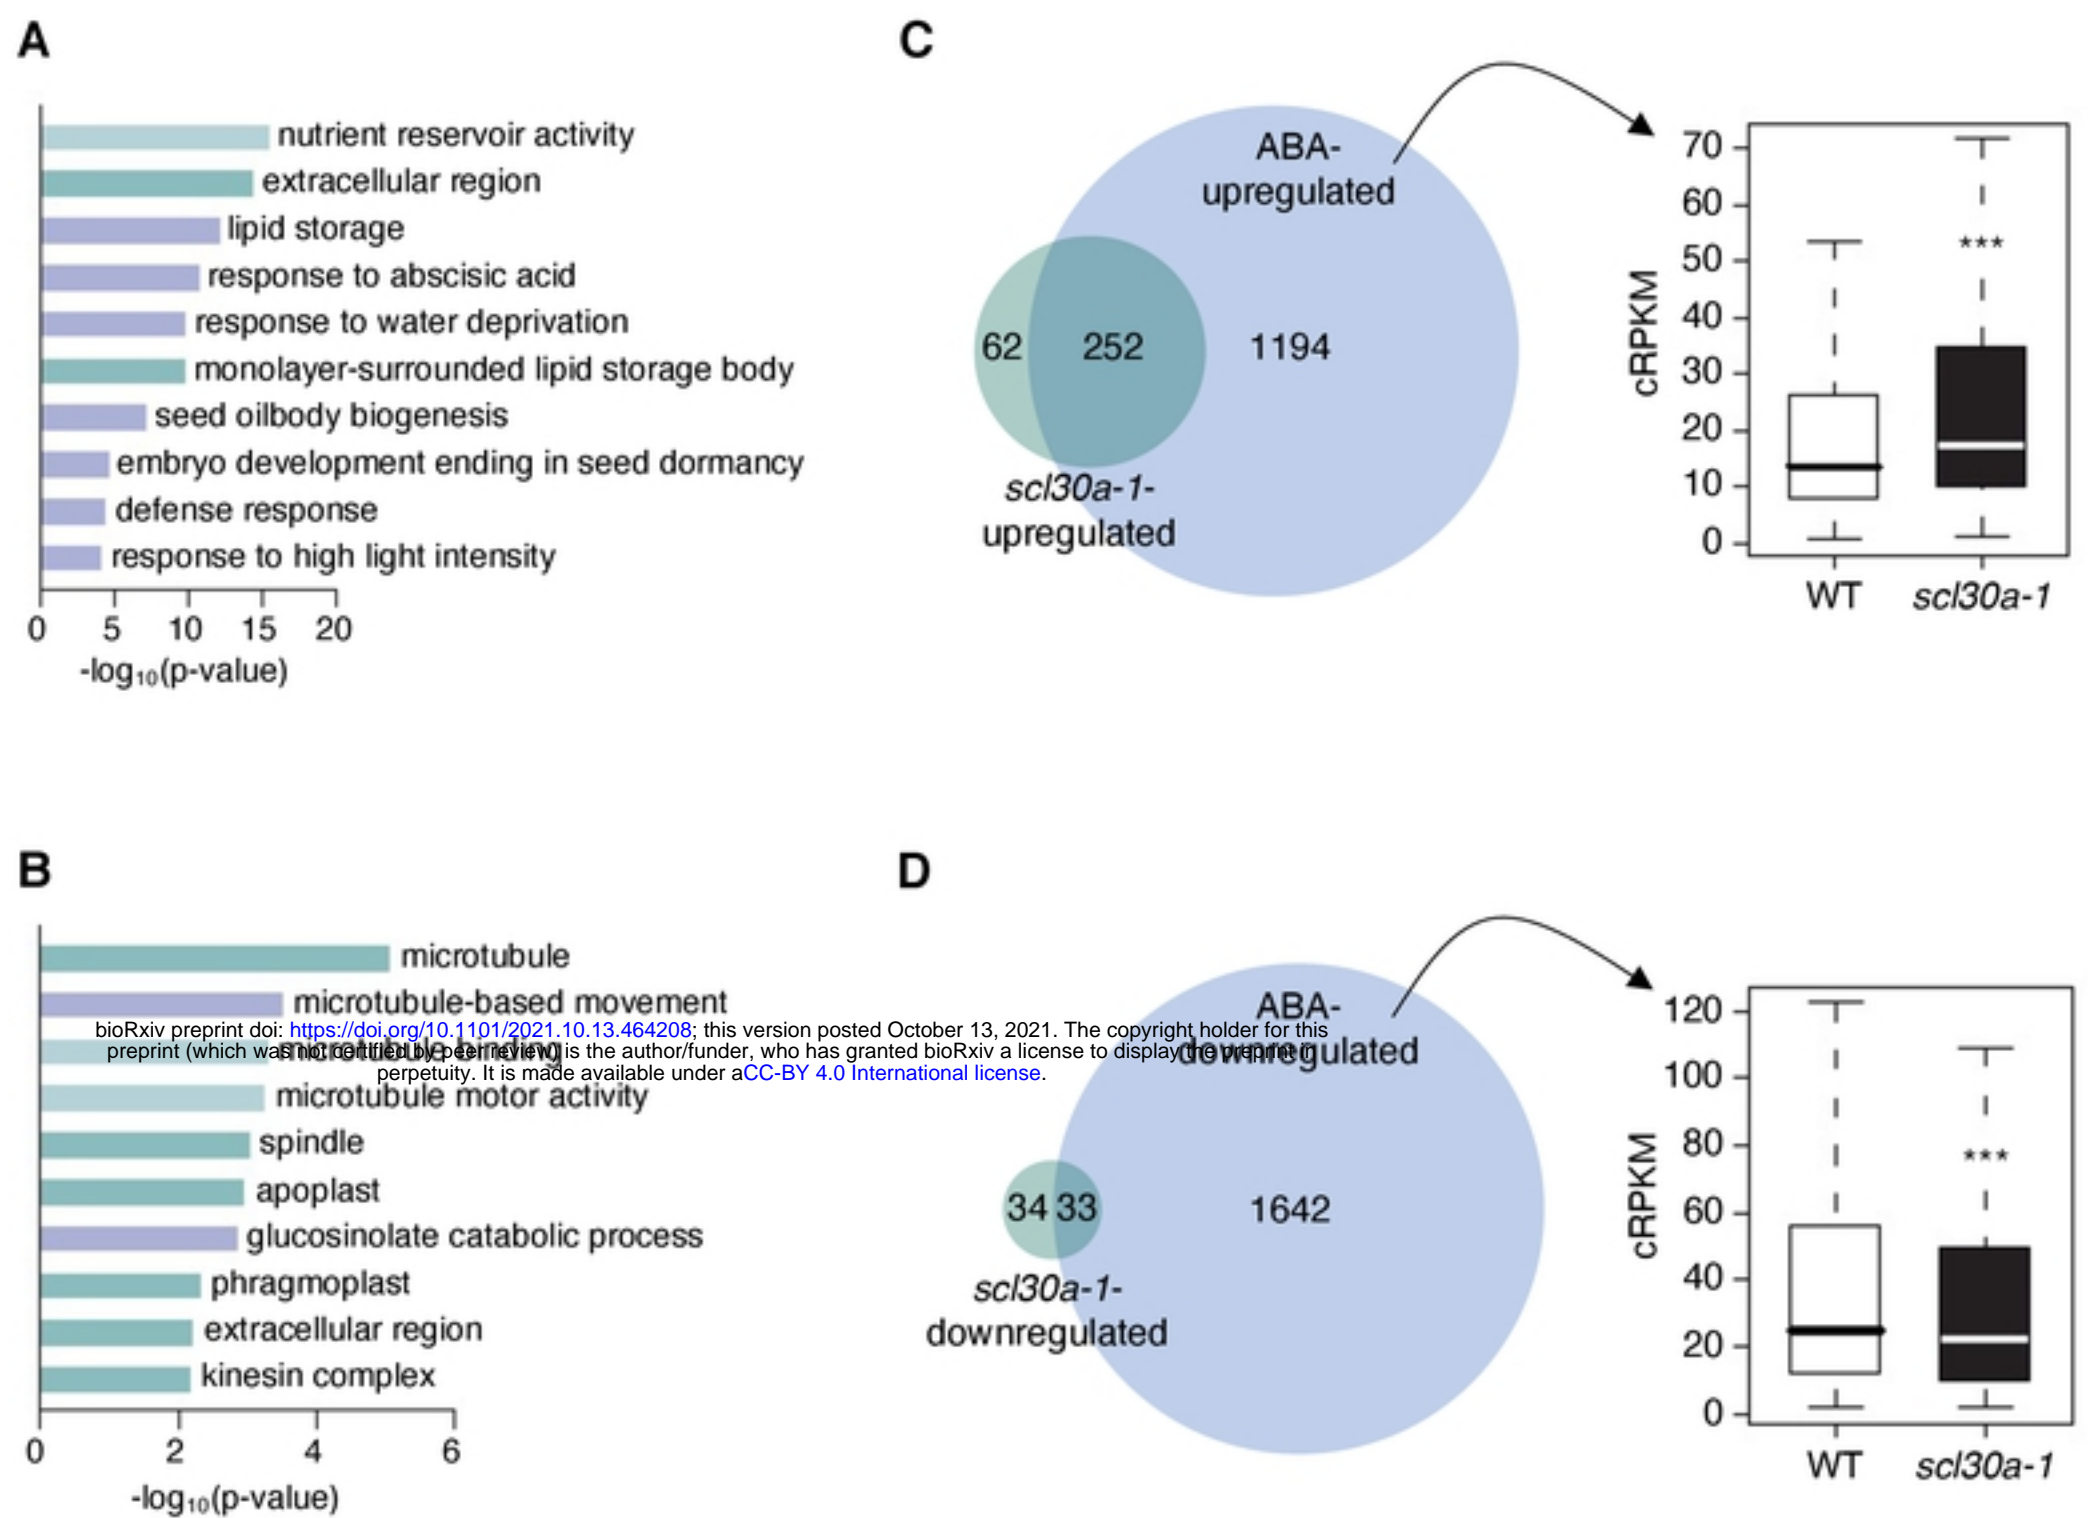

**Fig 4. Gene ontology analysis of *scl30a-1*-regulated genes and overlap with ABA transcriptional responses.**

**(A-B)** The ten most significantly enriched gene ontology categories, including biological process (purple bars), cellular component (dark-green bars) and molecular function (light-green bars), for the genes up- **(A)** and down- **(B)** regulated in the *scl30a-1* mutant. **(C-D)** Overlap between the genes up- **(C)** or down- **(D)** regulated in the *scl30a-1* mutant (green circles) with those up- **(C)** or down- **(D)** regulated by ABA in Arabidopsis germinating seeds from Costa et al. [49] (blue circles), respectively (see Materials and methods for details). The boxplots on the right represent the distribution of expression of the 1446 ABA-upregulated genes **(C)** and 1675 ABA-downregulated genes **(D)** [49] in wild-type (Col-0) and *scl30a-1* mutant germinating seeds (see Materials and methods for details), with the asterisks indicating significant differences from the Col-0 wild type (*Wilcoxon* test, \*\*\*  $p < 0.001$ ).

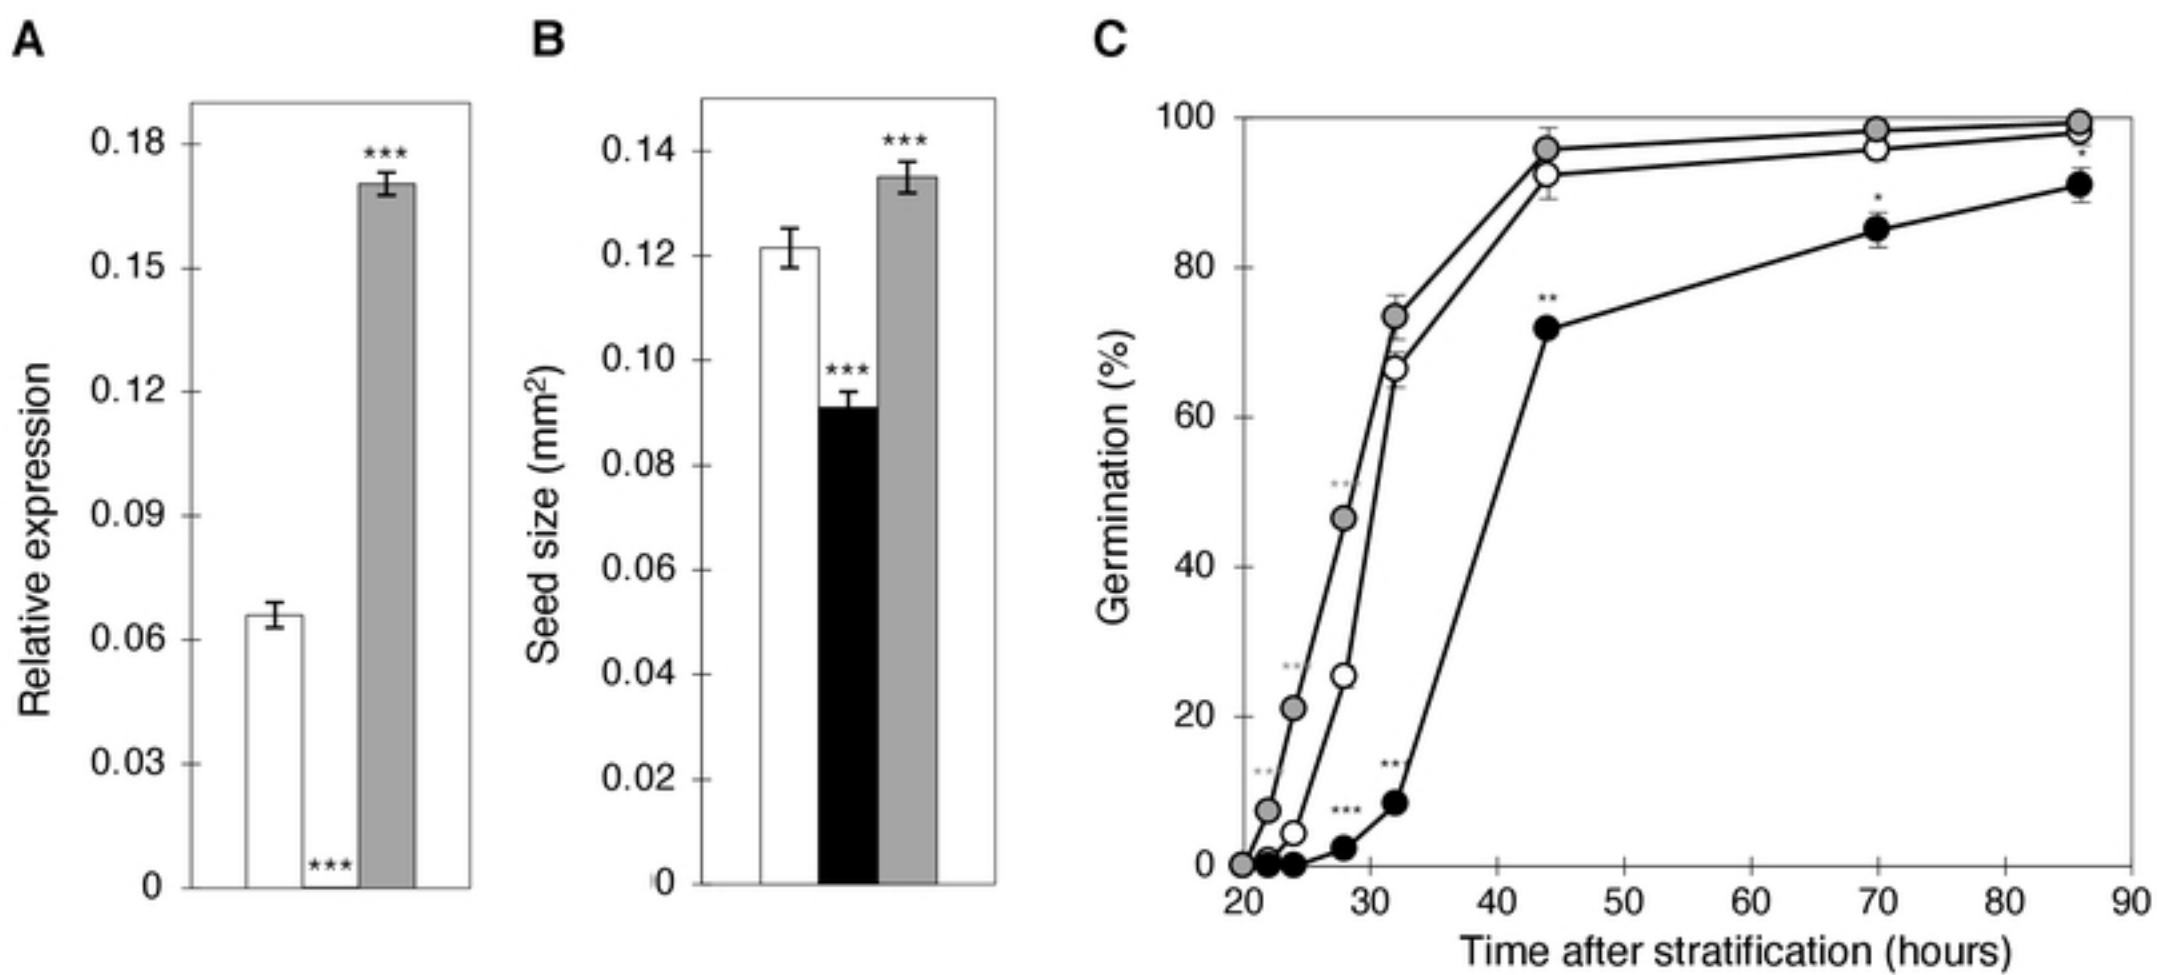

bioRxiv preprint doi: <https://doi.org/10.1101/2021.10.13.464208>; this version posted October 13, 2021. The copyright holder for this preprint (which was not certified by peer review) is the author/funder, who has granted bioRxiv a license to display the preprint in perpetuity. It is made available under aCC-BY 4.0 International license.

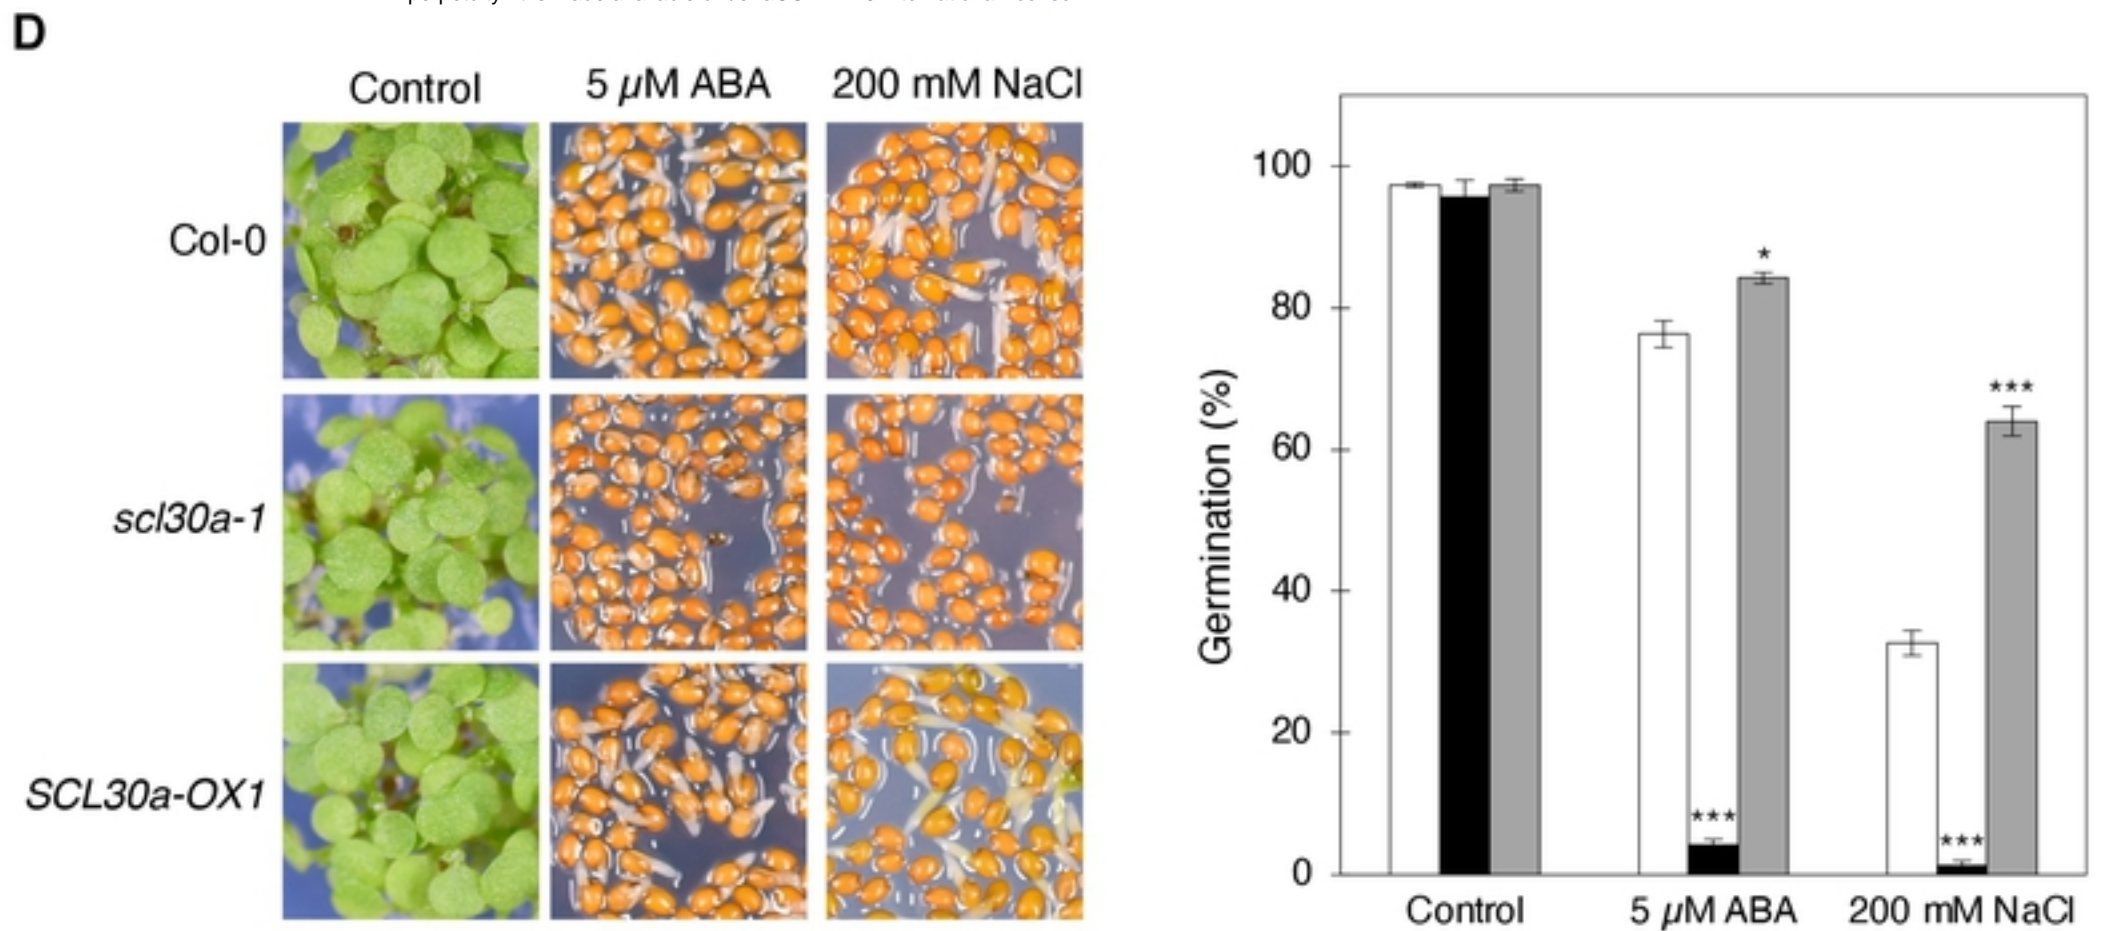

**Fig 5. Seed and germination phenotypes conferred by *SCL30a* overexpression.**

(A) RT-qPCR analysis of the expression levels of *SCL30a* in Col-0 (white bar), *scl30a-1* (black bar) and *SCL30a-OX1* (grey bar) 7-day-old seedlings (means  $\pm$  SE,  $n = 4$ ). Expression of the *ubiquitin (UBQ10)* gene was used as a loading control. (B) Size (expressed as area) of imbibed Col-0 (white bar), *scl30a-1* (black bar) and *SCL30a-OX1* (gray bar) seeds (means  $\pm$  SE,  $n \geq 30$ ). (C) Germination rates of Col-0 (white circles), *scl30a-1* (black circles), and *SCL30a-OX1* (gray circles) seeds scored during the first 3.5 days after stratification (means  $\pm$  SE,  $n = 3$ ). (D) Representative images of Col-0, *scl30a-1* and *SCL30a-OX1* seeds germinating in the absence (control) or presence of 5  $\mu$ M ABA or 200 mM NaCl 7 days after stratification, and germination percentages of Col-0 (white bars), *scl30a-1* (black bars) and *SCL30a-OX1* (gray bars) seeds in the absence (control) or presence of 5  $\mu$ M ABA or 200 mM NaCl scored 7 days after stratification (means  $\pm$  SE;  $n = 3$ ). In A-D, asterisks indicate statistically significant differences from the Col-0 wild type (\*  $p < 0.05$ , \*\*  $p < 0.01$ , \*\*\*  $p < 0.001$ ; Student's *t*-test).

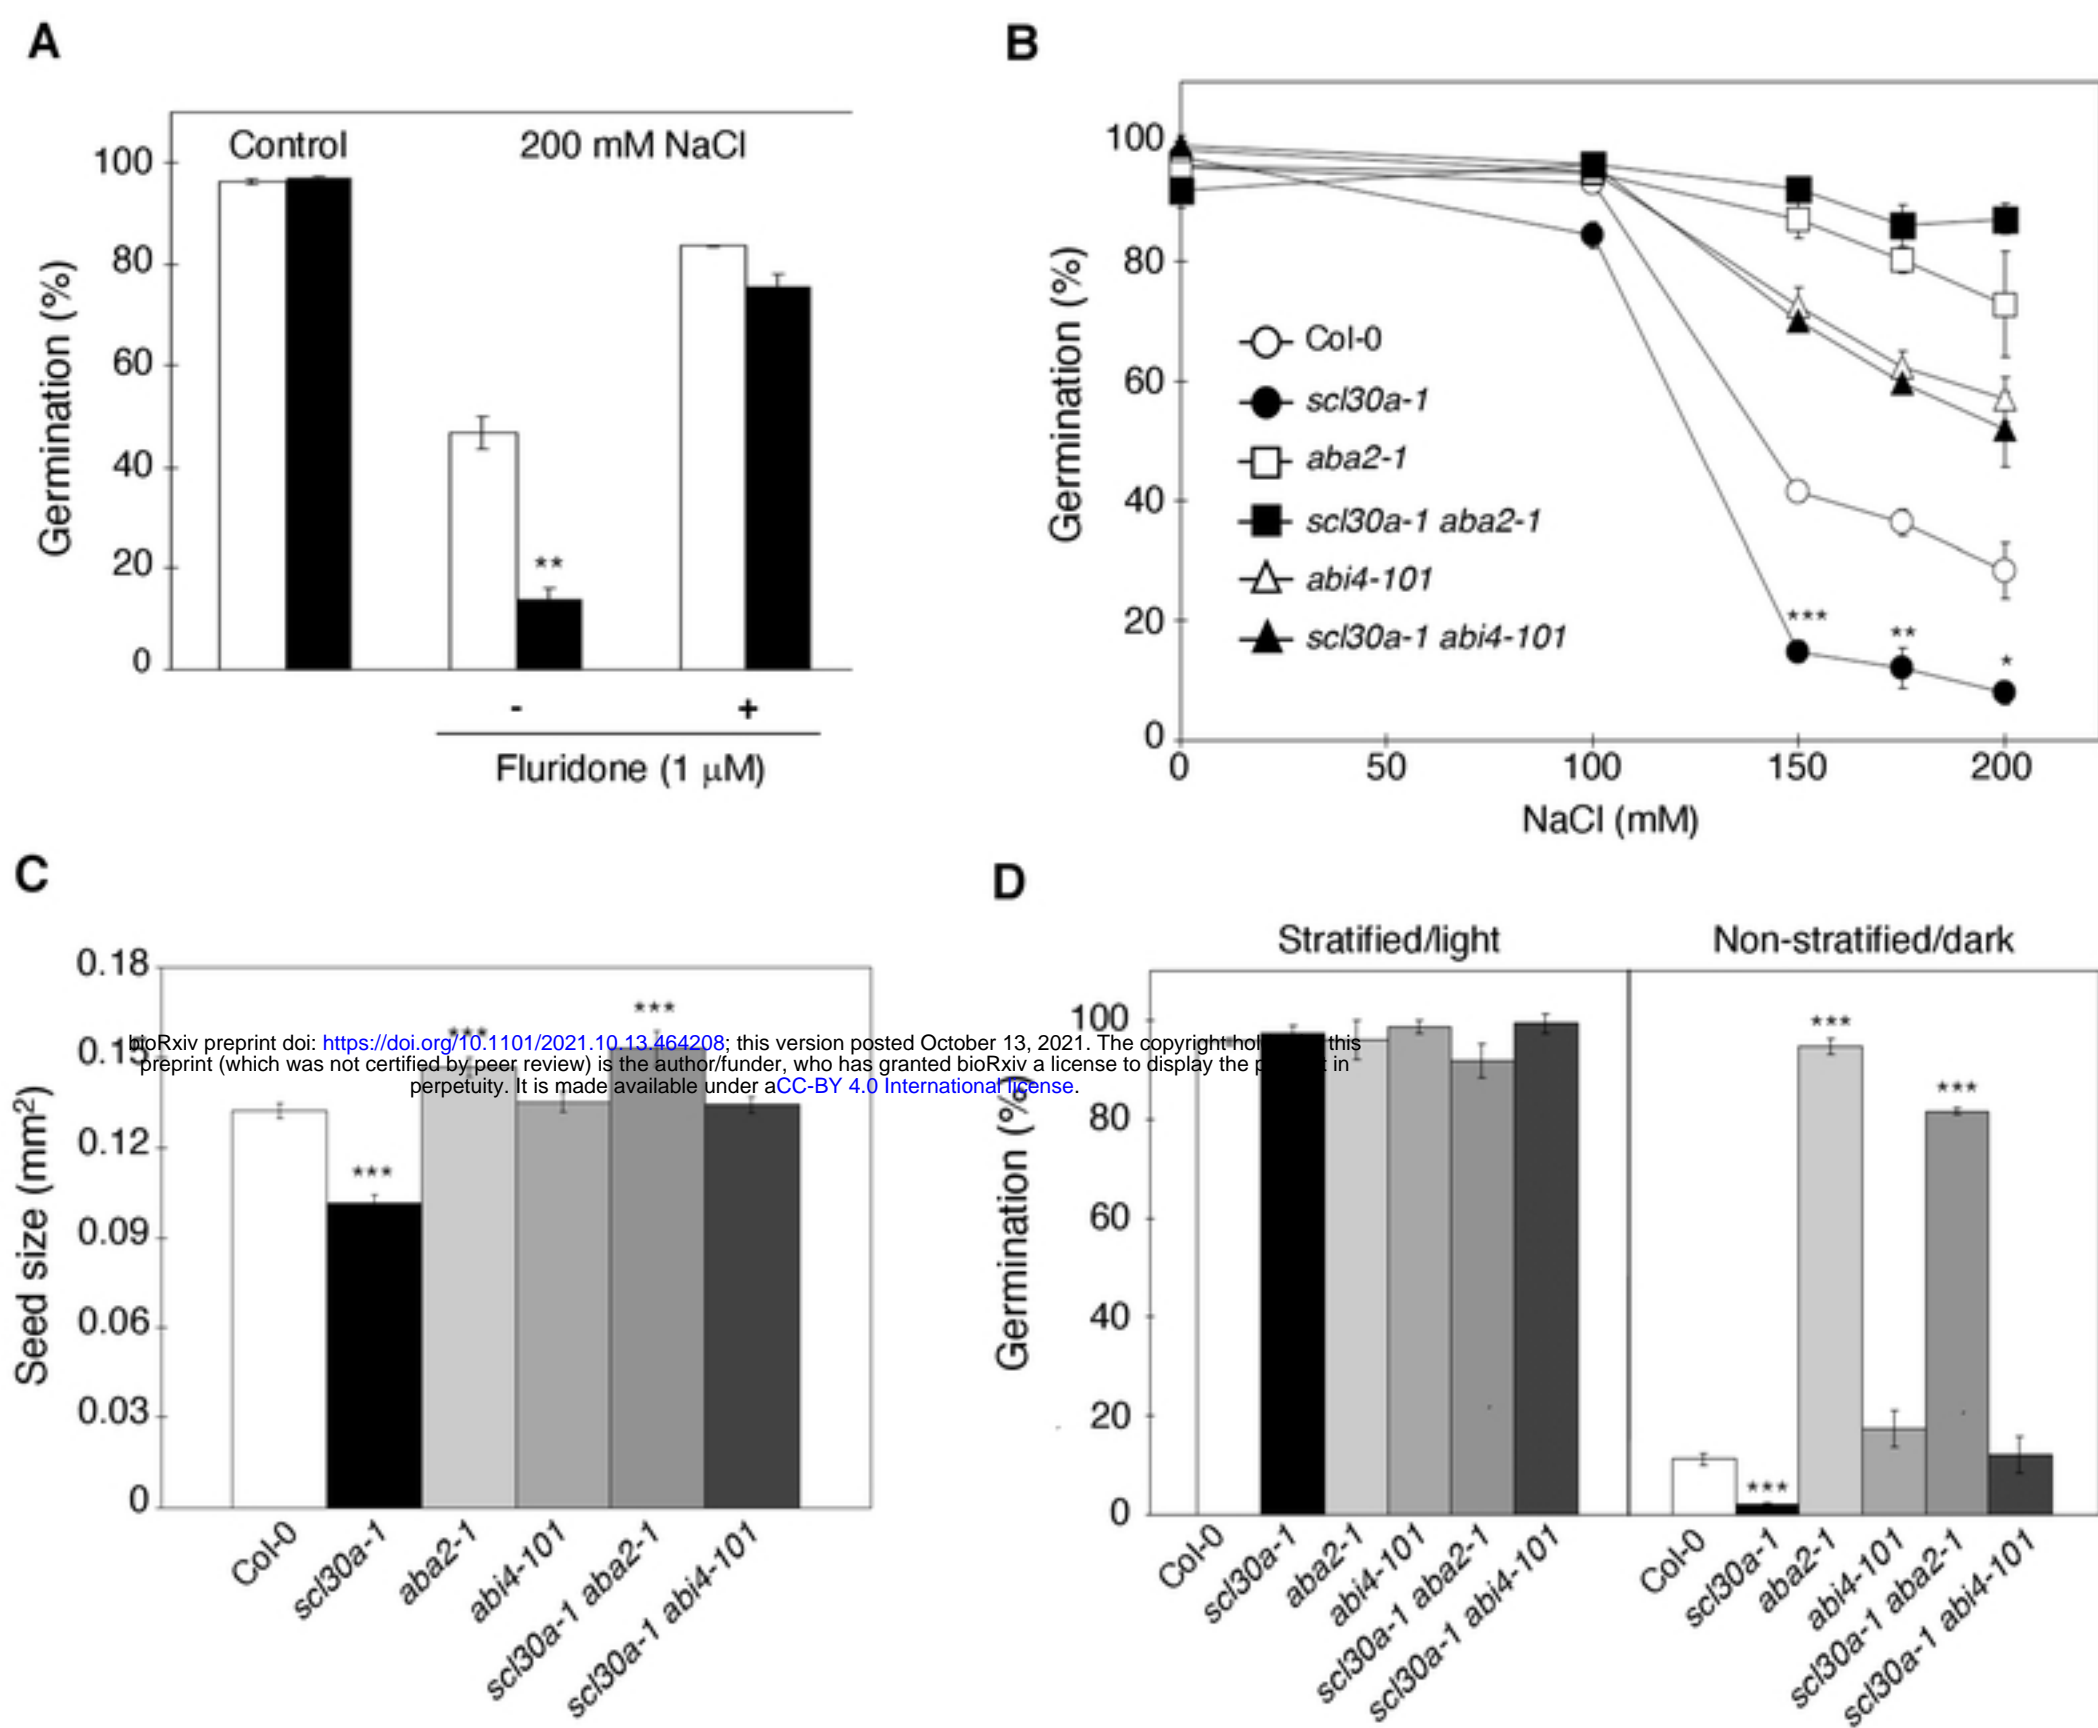

**Fig 6. ABA dependence of the *scl30a-1* mutant phenotypes.**

(A) Germination percentages of Col-0 (white bars) and *scl30a-1* (black bars) seeds in the absence (control) or presence of 200 mM NaCl supplemented or not with 1  $\mu$ M fluridone, scored 5 days after stratification (means  $\pm$  SE,  $n = 3$ ). Asterisks indicate statistically significant differences from the Col-0 wild type (\*\*  $p < 0.01$ ; Student's  $t$ -test). (B) Germination rates of Col-0, *scl30a-1*, *aba2-1*, *abi4-101*, *scl30a-1 aba2-1* and *scl30a-1 abi4-101* seeds under different NaCl concentrations scored 4 days after stratification (means  $\pm$  SE,  $n = 3$ ). Asterisks indicate statistically significant differences between the *scl30a-1* mutant and the Col-0 wild type or the double mutants and the corresponding ABA single mutant (\*  $p < 0.05$ , \*\*  $p < 0.01$ , \*\*\*  $p < 0.001$ ; Student's  $t$ -test). (C) Size (expressed as area) of imbibed Col-0, *scl30a-1*, *aba2-1*, *abi4-101*, *scl30a-1 aba2-1* and *scl30a-1 abi4-101* seeds (means  $\pm$  SE,  $n \geq 60$ ). Asterisks indicate statistically significant differences from the Col-0 wild type (\*\*\*)  $p < 0.001$ ; Student's  $t$ -test). (D) Germination percentages of freshly-harvested Col-0, *scl30a-1*, *aba2-1*, *abi4-101*, *scl30a-1 aba2-1* and *scl30a-1 abi4-101* seeds scored upon either stratification and 7 days of incubation in light or 7 days of incubation in darkness (means  $\pm$  SE,  $n = 3$ ). Asterisks indicate statistically significant differences from the Col-0 wild type (\*\*\*)  $p < 0.001$ ; Student's  $t$ -test).
